# Supplementary material
Source: MDPI journal article supplement (https://www.mdpi.com/1999-4907/12/9/1247)
Supplement: s1 [file s1]

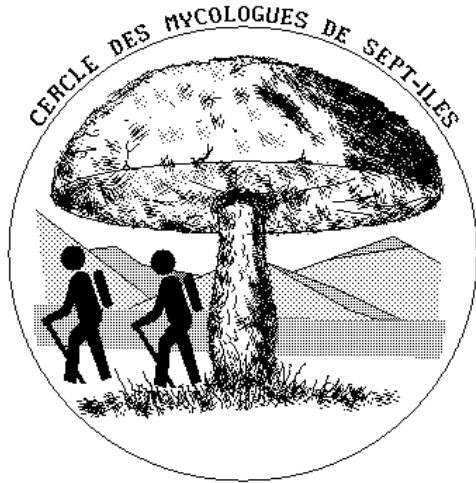

# Le champignon boréal

Bulletin du Cercle des mycologues de Sept-Îles

Vol.16, no 2, oct. 2015

Président: Gilles St-Amand  
Vice-prés.: André Gallant  
Secrétaire: Michèle Bergeron  
Trésorière: Sherley Renaud  
Administrateur : Bastien Boucher

---

## MOT DU PRÉSIDENT

Pour notre 20<sup>ième</sup> année d'activité, l'année 2015 a été bien occupée. Organiser la rencontre provinciale avec tout ce que ça implique de rencontres de planifications de décisions de négociations n'a pas été très difficile car j'ai pu compter sur l'appui des membres du conseil d'administration, la coopération extraordinaire du Cégep en plus des 21 membres du cercle qui se sont impliqués toute la fin de semaine de la rencontre. L'équipe du cercle de Québec a contribué grandement à l'identification des champignons et ils ont fait un très bon travail. Toute une fin de semaine avec 143 personnes, pour un petit cercle comme le nôtre c'est beaucoup demander mais je crois que ce fut un beau succès. Plusieurs courriels de participants nous ont félicités pour l'accueil, le déroulement et l'ensemble des activités, je n'ai eu à date que de bons commentaires.

Même si les champignons ne semblaient pas abondants durant cette fin de semaine, il fut récolté 282 espèces de champignons. Il y a eu entre autre, 19 espèces de bolets, 43 sortes de cortinaires, 23 espèces de lactaires et 16 espèces de russules. Pour avoir participé à presque tous les rassemblements provinciaux, je ne me rappelle pas d'avoir vu autant de différentes espèces de cortinaires sur les tables. Ce qui m'a surpris le plus c'est qu'il y a eu d'identifiées 70 nouvelles espèces que nous allons ajouter à notre liste des champignons de Sept-Îles. Ces nouvelles espèces représentent 25% des différentes sortes de champignons récoltés durant la fin de semaine. Je commence à penser que lorsque les champignons sont moins abondants les espèces moins courantes sont récoltées, peut-être parce qu'elles ont plus de place dans les paniers des mycologues peut-être aussi parce qu'elles poussent dans ces périodes.

Les bulletins vous seront envoyés par courriel, ce qui épargnera au cercle des frais de poste et de photocopies.

Gilles St Amand

# Inventaire des récoltes de la saison 2015

par Gilles St Amand

|     | <u>Date</u>   | <u>Lieu</u>                                                             | <u>Responsable</u>          |
|-----|---------------|-------------------------------------------------------------------------|-----------------------------|
| 1.  | 13 juin       | Première sortie : Voie ferrée du chemin du lac Daigle                   | Gilles St Amand             |
| 2.  | 1 août        | Deuxième sortie: Piste de ski de fond du Club Rapido                    | Gilles St Amand             |
| 3.  | 8 août        | Troisième sortie: Chemin du Lac Daigle près du 3 <sup>ième</sup> chenil | André Gallant               |
| 4.  | 15 août       | Quatrième sortie: Lac Labrie                                            | Gilles St Amand             |
| 5.  | 22 août       | Cinquième sortie: Ile Grande Basques                                    | Membres du C.A.             |
| 6.  | 29 août       | Sixième sortie: Chemin du 12 milles                                     | Gilles St Amand             |
| 7.  | 4-7 septembre | 16 <sup>ième</sup> rencontre FQGM                                       | Membres du C.A.             |
| 8.  | 12 septembre  | Huitième sortie: Piste de ski de fond du club Rapido                    | G. St Amand                 |
| 9.  | 19 septembre  | Neuvième sortie: Voie ferrée du chemin du lac Daigle                    | B. Boucher & Jeanie Saucier |
| 10. | 26 septembre  | Dixième sortie: Chemin du Lac Daigle, près du 3 <sup>ième</sup> Chenil  | A. Gallant                  |
| 11. | 3 octobre     | Onzième sortie: Stade Holliday                                          | Daniel & Sherley            |

| Nom latin                               | Nom français                 | Comestibilité  | 1 | 2 | 3 | 4 | 5 | 6 | 7 | 8 | 9 | 10 | 11 | 12 |
|-----------------------------------------|------------------------------|----------------|---|---|---|---|---|---|---|---|---|----|----|----|
| <b>1. Agarics (champignons à lames)</b> |                              |                |   |   |   |   |   |   |   |   |   |    |    |    |
| Agaricus arvensis                       | Agaris des jachères          | Excellent      |   |   |   |   |   |   | X |   |   |    |    |    |
| Agaricus diminutivus                    | Psaliote diminuée            | Comestible     |   |   | X |   |   |   |   |   |   |    |    |    |
| Agrocybe dura                           | Agrocybe dur                 | Comestible     |   |   |   |   |   |   | X |   |   |    |    |    |
| Amanita brunnescens                     | Amanite brunissante          | Non comestible |   |   |   |   |   |   | X |   |   |    |    |    |
| Amanita flavoconia                      | Amanite à voile jaune        | Suspectée      |   |   |   | X |   | X | X |   |   |    |    |    |
| Amanita amerifulva                      | Amanite fauve                | Comestible     |   |   |   | X | X | X | X | X |   |    |    |    |
| Amanita amerirubescens                  | Amanite rougissante          | Comestible     |   |   |   |   |   |   | X |   |   |    |    |    |
| Amanita muscaria guessowii              | Amanite tue-mouches          | Vénéneuse      |   | X | X |   | X | X | X | X |   | X  |    |    |
| Amanita porphyria                       | Amanite porphyre             | Suspectée      |   |   |   | X | X |   | X | X | X | X  | X  |    |
| Amanita sinocoflava                     | Amanite jaune paille         | Comestible     |   |   |   | X |   |   | X |   |   |    |    |    |
| Amanita subnigra                        | Amnite noirâtre              | Non comestible |   |   |   |   |   |   | X |   |   |    |    |    |
| Amanita vaginata var. alba              | Amanite vaginée var. blanche | Non comestible |   |   | X | X |   |   |   |   |   |    |    |    |
| Amanita wellsii                         | Amanite de Wells             | Douteuse       |   |   |   | X |   | X | X |   |   |    |    |    |
| Ampuloclitocybe clavipes                | Clitocybe à pied renflé      | Suspecte       |   |   |   |   | X |   | X |   |   |    | X  |    |
| Aphroditeola olida                      | Aphrodite odorante           | Sans intérêt   |   |   |   |   |   |   | X |   |   | X  |    |    |
| Arrhenia epichysium                     | Arrhénie lignicole           | Sans intérêt   |   |   |   |   |   |   | X |   |   |    |    |    |
| Atheniella adonis                       | Mycène adonis                | Sans intérêt   |   |   |   |   |   |   | X |   |   | X  |    |    |
| Cantharellula umbonata                  | Clitocybe omboné             | Bon            |   | X |   |   |   | X | X | X |   | X  |    |    |
| Catathelasma ventricosum                | Armillaire ventru            | Bon            |   |   |   |   |   |   | X |   |   |    |    |    |
| Chrysomphalina chrysopylla              | Omphale à lames jaunes       | Non comestible |   | X |   |   |   | X |   | X |   |    |    |    |
| Chroogomphus rutilus                    | Gomphide rutilant            | Comestible     |   |   |   |   |   |   |   |   |   |    | X  |    |
| Chroogomphus vinicolor                  | Gomphide vineux              | Comestible     |   |   |   |   |   |   | X |   |   |    | X  |    |
| Clitocybe ditopus                       | Clitocybe ubiquiste          | Non comestible |   |   |   | X |   | X |   | X |   |    |    |    |
| Clitocybe gibba                         | Clitocybe en entonnoir       | Comestible     |   |   |   |   | X |   |   |   |   |    |    |    |
| Clitocybe odora                         | Clitocybe odorant            | Comestible     |   |   |   |   |   | X |   |   |   |    |    |    |
| Clitocybe sinopica                      | Clitocybe cinabre            | Non comestible |   |   |   |   |   | X |   |   |   |    |    |    |
| Clitocybe squamulosa                    | Clitocybe squamuleux         | Comestible     |   | X | X |   |   |   | X | X |   |    |    |    |

| Nom latin                                     | Nom français                 | Comestibilité  | 1 | 2 | 3 | 4 | 5 | 6 | 7 | 8 | 9 | 10 | 11 | 12 |
|-----------------------------------------------|------------------------------|----------------|---|---|---|---|---|---|---|---|---|----|----|----|
| <i>Clitopilus prunulus</i>                    | Clitopile petite prune       | Comestible     |   |   |   |   |   | X |   |   |   |    |    |    |
| <i>Collibia cirrhata</i>                      | Collybie soyeuse             | Sans intérêt   |   | X | X | X | X |   |   |   |   |    |    |    |
| <i>Collibia cookei</i>                        | Collybie de Cooke            | Sans intérêt   |   |   |   | X |   |   | X |   |   |    |    |    |
| <i>Collybia tuberosa</i>                      | Collybie à sclérote          | sans intérêt   |   |   | X | X | X |   | X | X |   |    |    |    |
| <i>Conocybe tenera</i>                        | Conobybe tendre              | Sans intérêt   |   |   |   |   |   | X |   |   |   |    |    |    |
| <i>Coprinellus impatiens</i>                  | Coprin fausse psatyrelle     | Non comestible | X |   |   |   |   |   |   |   |   |    |    |    |
| <i>Coprinopsis jonesii</i>                    | Coprin faux lagopus          | Non comestible |   |   | X |   |   |   |   |   |   |    |    |    |
| <i>Cortinarius acutus</i>                     | Cortinaire pointu            | Inconnue       |   |   |   |   | X |   | X | X |   | X  |    |    |
| <i>Cortinarius alborufescens</i>              | Cortinaire blanc rougissant  | Inconnue       |   |   |   |   |   |   | X |   |   |    |    |    |
| <i>Cortinarius alboviolaceus</i>              | Cortinaire blanc-violet      | Inconnue       |   |   |   |   |   |   | X |   |   |    |    |    |
| <i>Cortinarius annulatus</i>                  | Cortinaire annelé            | Non comestible |   |   |   |   |   |   | X |   |   |    |    |    |
| <i>Cortinarius anomalus</i>                   | Cortinaire anormal           | Non comestible |   |   |   | X | X | X | X | X |   | X  | X  |    |
| <i>Cortinarius armeniacus</i>                 | Cortinaire d'Arménie         | Non comestible |   |   |   |   |   |   | X | X |   | X  |    |    |
| <i>Cortinarius armillatus</i>                 | Cortinaire à bracelets       | Comestible     |   | X |   | X |   |   | X | X | X | X  |    |    |
| <i>Cortinarius azureus</i>                    | Cortinaire azuré             | Non comestible |   |   |   |   |   |   | X |   |   |    |    |    |
| <i>Cortinarius biformis</i>                   | Cortinaire à deux formes     | Non comestible |   | X |   |   |   |   | X |   |   |    |    |    |
| <i>Cortinarius bolaris</i>                    | Cortinaire rouge-brique      | Non comestible |   |   |   | X |   |   | X | X |   |    |    |    |
| <i>Cortinarius brunneus</i>                   | Cortinaire brun              | Inconnue       |   |   |   | X |   | X | X | X | X | X  |    |    |
| <i>Cortinarius caesiocanescens</i>            |                              | Inconnue       |   |   |   |   |   |   | X |   |   |    |    |    |
| <i>Cortinarius camphoratus</i>                | Cortinaire puant             | non recommandé |   |   | X |   |   | X | X | X |   | X  |    |    |
| <i>Cortinarius caninus</i>                    | Cortinaire des chiens        | Non comestible |   |   | X | X | X |   |   | X | X |    |    |    |
| <i>Cortinarius caperatus</i>                  | Pholiote ridée               | Inconnue       |   |   | X |   | X | X | X | X | X | X  |    |    |
| <i>Cortinarius causticus</i>                  | Cortinaire amer              | Non comestible |   |   |   | X |   |   |   |   |   |    | X  |    |
| <i>Cortinarius chrysolitus</i>                | Cortinaire à lames olive     | Inconnue       |   |   |   |   | X | X | X | X |   | X  |    |    |
| <i>Cortinarius cinnabarinus</i>               | Cortinaire                   | Inconnue       |   |   |   |   |   |   | X |   |   |    |    |    |
| <i>Cortinarius collinitus</i>                 | Cortinaire des collines      | non comestible |   | X | X | X | X |   | X |   |   |    |    |    |
| <i>Cortinarius depressus</i>                  | Cortinaire déprimé           | Non comestible |   |   |   |   |   |   | X |   |   |    |    |    |
| <i>Cortinarius evernius</i>                   | Cortinaire humide            | Inconnue       |   | X | X | X | X | X | X | X |   |    |    |    |
| <i>Cortinarius flexipes</i>                   | Cortinaire à pied tortueux   | Inconnue       |   |   |   |   |   |   | X | X | X |    |    |    |
| <i>Cortinarius flexipes</i><br>var. flabellus | Cortinaire pélargonie        | Inconnue       |   |   |   |   | X |   |   |   | X |    |    |    |
| <i>Cortinarius fulvoocrascens</i>             | Cortinaire fauve ocré        | Inconnue       |   |   |   | X |   | X | X |   |   | X  |    |    |
| <i>Cortinarius glaucopus</i>                  | Cortinaire à pied glauque    | Inconnue       |   |   |   |   |   |   | X |   |   |    |    |    |
| <i>Cortinarius glandicolor</i>                | Cortinaire brun-de-gland     | Inconnue       |   |   |   | X |   |   |   |   |   | X  |    |    |
| <i>Cortinarius huronensis</i>                 | Cortinaire huron             | Inconnue       |   |   | X | X | X |   |   | X |   | X  | X  |    |
| <i>Cortinarius incognitus</i>                 | Cortinaire incognito         | Inconnue       |   |   |   |   |   |   | X |   |   |    |    |    |
| <i>Cortinarius infractus</i>                  | Cortinaire à marge brisée    | Inconnue       |   |   |   |   |   |   | X |   |   |    |    |    |
| <i>Cortinarius laniger</i>                    | Cortinaire laineux           | Inconnue       |   |   |   |   |   |   | X |   | X |    | X  |    |
| <i>Cortinarius livido-ochraceus</i>           |                              | Inconnue       |   |   |   |   |   |   | X |   |   |    |    |    |
| <i>Cortinarius malachius</i>                  | Cortinaire canescent         | Inconnue       |   |   |   |   |   |   | X |   |   |    |    |    |
| <i>Cortinarius malicorius</i>                 | Cortinaire à lames orange    | Inconnue       |   |   | X | X | X | X | X | X |   | X  | X  |    |
| <i>Cortinarius mucifluus</i>                  | Cortinaire à gelin diffluent | Inconnue       |   |   |   |   |   |   | X |   |   |    |    |    |
| <i>Cortinarius mucosus</i>                    | Cortinaire muqueux           | Inconnue       |   | X |   |   |   |   | X |   |   | X  | X  |    |

| Nom latin                    | Nom français                 | Comestibilité  | 1 | 2 | 3 | 4 | 5 | 6 | 7 | 8 | 9 | 10 | 11 | 12 |
|------------------------------|------------------------------|----------------|---|---|---|---|---|---|---|---|---|----|----|----|
| Cortinarius multiformis      | Cortinaire variable          | Inconnue       |   |   |   |   |   |   |   |   |   |    | X  |    |
| Cortinarius paragaudis       | Cortinaire à bracelet rouge  | Inconnue       |   |   |   |   |   |   | X | X |   |    |    |    |
| Cortinarius pholideus        | Cortinaire écailleux         | Inconnue       |   |   |   | X |   |   | X |   | X |    |    |    |
| Cortinarius sanguineus       | Cortinaire sanguin           | non comestible |   |   |   |   |   | X | X | X | X |    |    |    |
| Cortinarius saturnius        | Cortinaire saturnin          | Inconnue       |   |   |   |   |   |   | X |   |   |    |    |    |
| Cortinarius scaurus          | Cortinaire à pied-bot        | Non comestible |   |   |   |   |   |   | X |   |   |    |    |    |
| Cortinarius scutulatus       | Cortinaire                   | Inconnue       |   |   |   |   |   |   | X |   |   |    |    |    |
| Cortinarius semisanguineus   | Cortinaire moitié rouge sang | Suspecté       |   |   |   | X |   |   | X | X | X | X  | X  |    |
| Cortinarius sertipes         | Cortinaire                   | Inconnue       |   |   |   |   |   |   | X |   |   |    |    |    |
| Cortinarius subcroceofolius  | Cortinaire à lames safranées | Inconnue       |   |   |   |   |   |   | X |   |   |    |    |    |
| Cortinarius subtortus        | Cortinaire tordu             | Inconnue       |   |   |   |   |   |   | X |   |   |    |    |    |
| Cortinarius traganus         | Cortinaire à odeur de poire  | Suspecté       |   |   |   |   |   | X | X | X |   | X  | X  |    |
| Cortinarius trivialis        | Cortinaire gras              | Inconnue       |   | X |   |   | X |   |   | X |   |    |    |    |
| Cortinarius tubarius         | Cortinaire à pied tubuleux   | Inconnue       |   |   |   |   |   |   | X |   |   |    |    |    |
| Cortinarius venetus          | Cortinaire olivâtre          | Inconnue       |   |   |   |   |   |   |   |   | X |    |    |    |
| Cortinarius vibratilis       | Cortinaire scintillant       | Inconnue       |   |   |   |   |   |   | X |   |   |    |    |    |
| Crepidotus applanatus        | Crépidoète aplani            | Non comestible |   |   | X |   | X |   |   |   |   |    |    |    |
| Cuphophyllus pratensis       | Hygrophore des prés          | Comestible     |   |   |   |   |   |   | X |   |   |    |    |    |
| Cystoderma amianthinum       | Cystoderme amiantacé         | non recommandé |   |   |   |   |   | X | X | X |   |    |    |    |
| Cystoderma granosum          | Cystoderme grenu             | Non recommandé |   |   |   |   |   |   | X |   |   |    |    |    |
| Cystoderma jasonis           | Cystoderme de Jason          | Inconnue       |   |   |   |   |   |   | X |   |   |    |    |    |
| Entoloma abortivum           | Entolome avorté              | Comestible     |   |   |   | X |   |   | X |   |   |    |    |    |
| Entoloma bicolor             | Entolome bicolor             | Vénéneux       |   | X |   |   |   |   | X | X |   |    |    |    |
| Entoloma conicum             | Entolome conique             | Vénéneux       |   |   |   |   |   |   | X |   |   |    |    |    |
| Entoloma depluens            | Entolome resupiné            | Vénéneux       |   |   |   |   |   |   | X |   |   |    |    |    |
| Entoloma lividoalbum         | Entolome blanc livide        | Vénéneux       |   |   |   | X |   |   |   |   |   |    |    |    |
| Entoloma lucidum             | Entolome luisant             | Vénéneux       |   |   |   | X | X |   |   |   |   |    |    |    |
| Entoloma politum             | Entolome nitreux             | Vénéneux       |   |   |   | X |   |   |   |   | X | X  |    |    |
| Entoloma rhodopolium         | Entolome gris rosâtre        | Vénéneux       |   |   |   | X |   |   |   |   | X |    |    |    |
| Entoloma strictius var Isab. | Nolanie étroite              | Non comestible | X | X |   |   |   |   | X | X |   | X  |    |    |
| Gliophorus laetus            | Hygrophore poisseux          | Non comestible |   |   |   |   |   |   | X |   |   |    |    |    |
| Gliophorus psittacinus       | Hygrophore perroquet         | Non comestible |   |   |   |   |   |   | X |   |   |    |    |    |
| Gomphidius borealis          | Gomphide boréal              | Comestible     |   |   |   |   |   |   | X |   |   |    |    |    |
| Gomphidius glutinosus        | Gomphide glutineux           | Comestible     |   | X | X |   |   | X | X |   |   |    |    |    |
| Gymnopilus luteus            | Gymnopile jaune              | Non comestible |   |   |   |   |   |   |   |   | X |    |    |    |
| Gymnopilus penetrans         | Gymnopile aromatique         | Non comestible |   | X | X | X | X | X | X |   |   |    |    |    |
| Gymnopilus picreus           | Gymnopile amer               | Non comestible |   |   |   |   |   |   | X |   |   |    |    |    |
| Gymnopilus sapineus          | Gymnopile du sapin           | Non comestible |   |   |   |   |   |   |   |   | X |    |    |    |
| Gymnopus acervatus           | Collybie en touffes          | Médiocre       |   |   |   | X | X |   | X |   |   |    |    |    |
| Gymnopus androsaceus         | Marasme crin-de-cheval       | Non comestible |   |   |   |   | X |   |   |   |   |    |    |    |
| Gymnopus confluens           | Collybie confluente          | Comestible     |   | X | X | X | X | X | X | X |   |    |    |    |
| Gymnopus dryophilus          | Collybie des chênes          | Comestible     |   |   | X | X | X | X | X | X |   |    |    |    |

| Nom latin                      | Nom français                 | Comestibilité  | 1 | 2 | 3 | 4 | 5 | 6 | 7 | 8 | 9 | 10 | 11 | 12 |
|--------------------------------|------------------------------|----------------|---|---|---|---|---|---|---|---|---|----|----|----|
| Gymnopus earleae               | Collibie printanière         | Comestible     | X |   |   |   |   |   |   |   |   |    |    |    |
| Hebeloma crustuliniforme       | Hébélome croute de pain      | Toxique        |   |   |   |   |   |   |   |   |   | X  |    |    |
| Hebeloma mesophaeum            | Hébélome à centre brun       | Suspecté       |   |   |   |   | X |   |   |   |   | X  |    |    |
| Humidicutis marginata          | Hygrophore à lames marginées | Non comestible |   |   |   |   |   |   | X | X |   |    |    |    |
| Hygrocybe cantharellus         | Hygrophore chanterelle       | Inconnue       |   |   |   |   |   |   | X | X | X |    |    |    |
| Hygrocybe chlorophana          | Hygrophore à lames orangé    | Non recommandé |   |   |   |   | X |   |   |   |   |    |    |    |
| Hygrocybe coccineucrenata      | Hygrophore crête-de-coq      | Non comestible |   |   |   |   |   |   | X |   |   |    |    |    |
| Hygrocybe conica               | Hygrophore conique           | Non comestible |   |   |   |   |   |   | X |   |   |    |    |    |
| Hygrocybe miniata              | Hygrophore vermillon         | Comestible     |   |   | X |   |   |   |   |   |   |    |    |    |
| Hygrocybe squamulosa           | Hygrophore squamuleux        | Comestible     |   |   |   |   |   |   | X |   |   |    |    |    |
| Hygrophorus agathosmus         | Hygrophore à odeur agréable  | Comestible     |   |   |   |   |   |   |   |   |   |    | X  |    |
| Hygrophorus olivacealbus       | Hygrophore blanc violacé     | Comestible     |   |   |   |   |   |   |   |   |   | X  |    |    |
| Hygrophorus pustulatus         | Hygrophore pustuleux         | Non comestible |   |   |   |   |   |   | X |   |   |    |    |    |
| Hypholoma capnoides            | Hypholome à lames enfumées   | Non comestible |   |   |   |   | X |   | X | X |   | X  |    |    |
| Hypholoma elongatum            | Hypholome à long pied        | Non comestible |   |   |   |   |   |   | X |   |   |    |    |    |
| Hypholoma flavi-folium         | Hypholome à lamelles jaunes  | Non comestible |   |   |   |   | X |   |   |   |   |    |    |    |
| Hypholoma lateritium           | Hypholome couleur de brique  | Non comestible | X |   |   |   |   |   |   |   |   |    |    |    |
| Inocybe albodisca              | Inocybe à disque blanc       | Non comestible |   |   |   |   |   |   | X |   |   |    |    |    |
| Inocybe calamistrata           | Inocybe à base verte         | Allucinogène   |   |   |   |   |   |   | X |   |   |    |    |    |
| Inocybe geophylla              | Inocybe blanc                | Vénéneux       |   |   |   |   |   |   | X | X | X | X  |    |    |
| Inocybe geophylla var lilacina | Inocybe lilacin              | Vénéneux       |   |   |   |   |   |   | X |   |   |    |    |    |
| Inocybe hystrix                | Inocybe hérissé              | Vénéneux       |   |   |   |   |   |   | X |   |   |    |    |    |
| Inocybe lacera                 | Inocybe lacéré               | Vénéneux       |   |   | X | X |   | X | X | X |   |    |    |    |
| Inocybe lanuginosa             | Inocybe laineux              | Toxique        |   | X | X | X | X |   |   |   |   | X  |    |    |
| Inocybe mixtilis               | Inocybe en tabouret          | Toxique        |   | X | X | X |   | X |   |   |   |    |    |    |
| Laccaria bicolor               | Laccaria bicolore            | Comestible     |   | X | X | X | X | X | X |   | X |    | X  |    |
| Laccaria laccata ss.lato       | Laccaria laqué               | Comestible     |   |   |   |   | X |   |   |   |   |    |    |    |
| Laccaria longipes              | Laccaria à long pied         | Comestible     |   | X |   |   |   |   | X | X | X |    |    |    |
| Laccaria nobilis               | Laccaria noble               | Comestible     |   |   | X |   |   |   | X | X |   | X  |    |    |
| Laccaria striatula             | Laccaria strié               | Inconnue       |   |   | X |   | X | X | X |   |   |    |    |    |
| Lactarius affinis              | Lactaire affine              | non comestible |   | X | X |   | X | X | X | X | X | X  |    |    |
| Lactarius camphoratus          | Lactaire camphré             | Non comestible |   |   | X |   | X | X | X | X | X |    |    |    |
| Lactarius deterrimus           | Lactaire des épinettes       | Bon            |   |   |   |   |   |   | X |   | X | X  |    |    |
| Lactarius fumosus              | Lactaire enfumé              | Inconnue       |   |   |   |   |   | X |   |   |   |    |    |    |
| Lactarius glysius              | Lactaire odorant             | non comestible |   |   | X |   |   |   | X |   | X | X  |    |    |
| Lactarius helvus               | Lactaire à odeur d'érable    | non comestible |   |   |   |   |   |   | X | X |   |    |    |    |
| Lactarius lignyotus            | Lactaire couleur de suie     | Excellent      |   | X | X |   | X | X | X | X |   | X  |    |    |
| Lactarius mammosus             | Lactaire de Hibbard          | Douteux        |   |   | X | X |   |   | X | X | X | X  |    |    |
| Lactarius midlandensis         | Lactaire de Midland          | Inconnue       |   |   |   |   |   |   | X |   |   |    |    |    |
| Lactarius mucidus              | Lactaire muqueux             | non comestible |   | X | X |   |   |   | X |   | X | X  |    |    |
| Lactarius nitidus              | Lactaire brillant            | non comestible |   |   |   | X | X |   | X | X | X | X  |    |    |
| Lactarius paradoxus            | Lactaire paradoxal           | Non comestible |   | X |   |   |   |   | X |   |   |    |    |    |

| Nom latin                      | Nom français               | Comestibilité  | 1 | 2 | 3 | 4 | 5 | 6 | 7 | 8 | 9 | 10 | 11 | 12 |
|--------------------------------|----------------------------|----------------|---|---|---|---|---|---|---|---|---|----|----|----|
| Lactarius pubescens            | Lactaire pubescent         | Non comestible |   |   | X |   | X |   | X |   |   |    |    |    |
| Lactarius resimus              | Lactaire retroussé         | non comestible |   |   | X |   |   |   | X |   |   |    |    |    |
| Lactarius rufus                | Lactaire roux              | Vénéneux       |   |   |   |   |   |   | X | X |   | X  |    |    |
| Lactarius sordidus             | Lactaire sordide           | Non comestible |   |   |   |   | X | X | X | X |   | X  |    |    |
| Lactarius tabidus              | Lactaire à lait soufré     | non comestible |   |   | X | X | X | X | X |   | X | X  |    |    |
| Lactarius thynos               | Lactaire saumon            | Comestible     |   |   |   |   |   |   | X |   |   |    |    |    |
| Lactarius torminosus           | Lactaire à toison          | Vénéneux       |   |   |   | X |   |   |   |   |   |    | X  |    |
| Lactarius trivialis            | Lactaire trivial           | non comestible |   |   |   |   |   | X | X |   | X | X  |    |    |
| Lactarius uvidus               | Lactaire raisin            | Non comestible |   |   |   |   |   |   |   |   |   | X  |    |    |
| Lactarius vietus               | Lactaire fané              | Suspecté       |   |   |   |   |   |   | X |   |   |    |    |    |
| Lactifluus deceptivus          | Lactaire décevant          | Non comestible |   |   |   |   |   |   | X | X | X |    |    |    |
| Lepiota cortinarius            | Lépiote cortinaire         | Non comestible |   |   | X |   |   |   |   |   |   |    |    |    |
| Lepiota cristata               | Lépiote crépue             | Non comestible |   |   |   |   |   |   |   |   | X |    |    |    |
| Leucophleps spinispora         |                            | Inconue        |   |   |   |   |   |   | X |   |   |    |    |    |
| Lichenomphalia umbellifera     | Omphale en ombelle         | Sans intérêt   |   |   |   |   |   |   | X |   |   |    |    |    |
| Lyophyllum gracile             | Lyophylle gracile          | Inconnue       |   |   |   |   |   |   | X |   |   |    |    |    |
| Lyophyllum semitale            | Lyophille des sentiers     | Inconnue       |   |   |   |   |   |   |   | X |   |    |    |    |
| Marasmius oreades              | Marasme des Oréades        | Excellent      |   | X | X |   |   | X |   | X |   |    |    |    |
| Marasmius rotula               | Marasme petite roue        | Sans intérêt   |   |   |   | X |   |   |   |   |   |    |    |    |
| Marasmius siccus               | Marasme sec                | Non comestible |   | X |   |   |   |   |   |   |   |    |    |    |
| Mycena abramsii                | Mycène printanière         | Inconnue       | X |   |   |   |   |   |   |   |   |    |    |    |
| Mycena epipterygia             | Mycène des fougères        | Sans intérêt   |   |   |   |   |   |   | X |   |   |    |    |    |
| Mycena floridula               | Mycène fleur-jaune         | Sans intérêt   |   |   |   |   |   |   | X |   |   |    |    |    |
| Mycena haematopus              | Mycène à pied rouge        | Inconnue       |   |   | X |   |   |   | X |   |   |    |    |    |
| Mycena leptcephala             | Mycène chlorée             | non comestible |   |   |   | X |   |   |   |   |   |    |    |    |
| Mycena pura                    | Mycène pure                | non comestible |   | X | X |   | X |   | X |   |   |    |    |    |
| Mycena purpureofusca           | Mycène pourpre foncé       | Sans intérêt   |   |   |   |   |   |   | X |   |   |    |    |    |
| Mycenitis scorodonius          | Marasme à odeur d'ail      | Comestible     |   |   |   |   | X |   |   |   |   |    |    |    |
| Panellus stypticus             | Panelle astringente        | non comestible | X |   | X |   |   |   | X |   | X |    |    |    |
| Panaeolina foenisecii          | Panéolle des foin          | Non comestible |   |   |   |   |   |   | X |   |   |    |    |    |
| Paxillus involutus             | Paxille enroulé            | Toxique        |   | X |   | X | X | X | X | X | X | X  |    |    |
| Philiotopsis nidulans          | Pleutore petit nid         | Médiocre       |   |   |   |   |   |   | X |   | X |    |    |    |
| Pholiota highlandensis         | Pholiote des brulis        | Non comestible | X |   |   |   |   |   |   |   |   |    |    |    |
| Pholiota limonella             | Pholiote jaune citron      | Non comestible |   |   | X |   |   |   |   |   |   |    |    |    |
| Pholiota mixta                 | Pholiote voisine           | Non comestible |   |   |   |   |   |   | X |   |   |    |    |    |
| Pholiota squarrosa             | Pholiote écailleuse        | Non comestible |   |   |   |   |   |   |   |   |   | X  |    |    |
| Pholiota spumosa               | Pholiote écumeuse          | Non comestible |   |   |   |   |   |   |   |   |   | X  |    |    |
| Pleurocybella porrigens        | Pleurote étalé             | Bon            |   |   |   |   |   |   |   |   | X |    |    |    |
| Pleurotus ostreatus            | Pleurote en forme d'huitre | Comestible     | X | X |   |   |   |   |   |   |   |    |    |    |
| Pluteus cervinus               | Plutée couleur de cerf     | Comestible     |   |   | X |   |   |   | X |   | X |    |    |    |
| Psathyrella candolleana        | Psathyrelle de Decandolle  | Comestible     |   | X | X |   |   | X | X |   |   |    |    |    |
| Pseudoarmillariella ectypoides | Omphale gaufrée            | Sans intérêt   |   |   |   |   |   |   | X |   |   |    |    |    |

| Nom latin                          | Nom français                   | Comestibilité  | 1 | 2 | 3 | 4 | 5 | 6 | 7 | 8 | 9 | 10 | 11 | 12 |
|------------------------------------|--------------------------------|----------------|---|---|---|---|---|---|---|---|---|----|----|----|
| <i>Pseudoomphalina pachyphylla</i> | Clitocybe à larges lames       | Non comestible |   |   |   |   |   |   | X |   |   |    |    |    |
| <i>Rhodocollybia butyracea</i>     | Collybie butyracée             | Comestible     |   |   |   |   | X |   | X |   |   |    |    |    |
| <i>Rhodocollybia maculata</i>      | Collybie maculée               | Comestible     |   |   | X |   |   | X | X |   |   | X  |    |    |
| <i>Rhodocollybia scorzonerea</i>   | Collybie maculée var jaunâtre  | Médiocre       |   |   |   |   |   | X | X | X |   |    |    |    |
| <i>Rickenella fibula</i>           | Mycène épingle                 | Non comestible |   | X |   |   |   |   |   | X |   |    |    |    |
| <i>Russula abietina</i>            | Russule des sapins             | non comestible |   |   | X |   |   |   |   |   | X |    |    |    |
| <i>Russula adusta</i>              | Russule brulée                 | Suspectée      |   | X | X |   |   | X | X |   |   |    |    |    |
| <i>Russula aeruginea</i>           | Russule vert-de-gris           | Bonne          |   | X | X |   |   |   | X | X | X |    | X  |    |
| <i>Russula brevipes</i>            | Russule à pied court           | Comestible     |   | X | X |   |   |   | X |   | X | X  | X  |    |
| <i>Russula brevipes var acior</i>  | Russule à pied court var verte | Comestible     |   |   | X | X |   |   |   |   |   |    |    |    |
| <i>Russula brunneola</i>           | Russule brunâtre               | Bonne          |   | X | X |   | X |   | X | X | X |    |    |    |
| <i>Russula cicatricata</i>         | Russule gercée                 | Inconnue       |   |   |   |   |   |   | X |   |   |    |    |    |
| <i>Russula citrinolutea</i>        | Russule citrine                | Inconnue       |   |   |   |   |   |   | X |   |   |    |    |    |
| <i>Russula claroflava</i>          | Russule jaune clair            | Comestible     |   | X |   | X |   |   |   |   | X |    |    |    |
| <i>Russula compacta</i>            | Russule compacte               | Comestible     |   |   |   |   | X |   |   |   |   |    |    |    |
| <i>Russula decolorans</i>          | Russule décolorée              | Comestible     |   | X |   |   | X |   | X |   |   |    | X  |    |
| <i>Russula elaoades</i>            | Russule vert olive             | Bon comestible |   |   | X | X | X | X | X |   |   |    |    |    |
| <i>Russula emetica</i>             | Russule émétique               | non comestible |   | X | X |   |   |   |   | X |   | X  |    |    |
| <i>Russula fragilis</i>            | Russule fragile                | non comestible |   |   | X | X | X | X | X | X | X | X  |    |    |
| <i>Russula fulvescens</i>          | Russule fauvâtre               | Inconnue       |   | X |   | X |   | X |   |   |   |    |    |    |
| <i>Russula graveolens</i>          | Russule malodorante            | Comestible     |   |   | X | X |   |   | X | X | X | X  | X  |    |
| <i>Russula hydrophila</i>          | Russule hydrophile             | Non comestible |   | X | X |   | X | X | X | X | X |    |    |    |
| <i>Russula nigrodisca</i>          | Russule à centre noir          | non comestible |   |   |   | X | X | X |   |   | X | X  |    |    |
| <i>Russula mustelina</i>           | Russule belette                | Comestible     |   |   |   |   |   |   | X |   |   |    |    |    |
| <i>Russula paludosa</i>            | Russule des marais             | Comestible     |   | X | X | X | X | X | X | X | X | X  |    |    |
| <i>Russula peckii</i>              | Russule de Peck                | Bonne          |   |   |   | X | X | X | X | X |   | X  |    |    |
| <i>Russula squalida</i>            | Russule feuille morte          | Bon comestible |   |   |   |   |   |   | X |   |   |    |    |    |
| <i>Russula vinacea</i>             | Russule noir pourpré           | Comestible     |   |   |   |   |   |   | X |   |   |    |    |    |
| <i>Spagnurus paluster</i>          | Téphrocye des marais           | Inconnue       |   |   |   |   |   |   | X |   |   |    |    |    |
| <i>Tricholoma aestuans</i>         | Trocholome amer                | Non comestible |   |   |   |   |   |   | X |   |   |    | X  |    |
| <i>Tricholoma atosquamosum</i>     | Tricholome à écailles noires   | Non comestible |   |   |   |   |   |   |   |   |   | X  |    |    |
| <i>Tricholoma davisiae</i>         | Tricholome de Davis            | Inconnue       |   |   |   |   |   | X | X |   |   |    | X  |    |
| <i>Tricholoma equestre</i>         | Tricholome équestre            | Comestible     |   |   |   |   |   |   | X |   |   | X  |    |    |
| <i>Tricholoma focale</i>           | Tricholome à foulard           | Médiocre       |   |   |   |   |   |   |   |   |   |    | X  |    |
| <i>Tricholoma fumosoluteum</i>     | Tricholome jaune fuligineux    | Médiocre       |   |   |   |   |   |   |   |   | X | X  |    |    |
| <i>Tricholoma imbricatum</i>       | Tricholome imbriqué            | Comestible     |   |   |   |   |   |   |   | X |   |    | X  |    |
| <i>Tricholoma inamoenum</i>        | Tricholo. à odeur désagréable  | Inconnue       |   |   | X |   |   | X | X | X |   | X  |    |    |
| <i>Tricholoma magnivelare</i>      | Tricholome à grand voile       | Excellent      |   | X |   |   |   | X | X |   |   |    | X  |    |
| <i>Tricholoma pseudoterreum</i>    | Tricholome faux-terreux        | Inconnue       |   |   |   |   |   |   |   |   |   |    | X  |    |
| <i>Tricholoma roseoacervum</i>     | Tricholome acerbe rosé         | Non comestible |   |   |   |   |   |   |   | X |   | X  | X  |    |
| <i>Tricholoma saponaceum</i>       | Tricholome savon               | non comestible |   | X |   |   |   | X | X |   | X | X  | X  |    |

| Nom latin                   | Nom français               | Comestibilité  | 1 | 2 | 3 | 4 | 5 | 6 | 7 | 8 | 9 | 10 | 11 | 12 |
|-----------------------------|----------------------------|----------------|---|---|---|---|---|---|---|---|---|----|----|----|
| Tricholoma transmutans      | Tricholome changeant       | Inconnue       |   | X | X |   | X | X | X | X |   | X  | X  |    |
| Tricholoma virgatum         | Tricholome vergeté         | Non comestible |   |   |   |   |   |   | X |   | X |    |    |    |
| Tricholomopsis decora       | Tricholome décoré          | non comestible |   | X |   | X |   |   | X |   | X |    |    |    |
| Tricholomopsis sulfureoides | Tricholome faux-sulphureum | Non comestible |   |   |   |   |   |   | X |   |   |    |    |    |
| Tubaria confragosa          | Tubaire annelé             | non comestible |   |   |   |   | X |   |   |   |   | X  |    |    |
| Tubaria furfuracea          | Tubaire furfuracé          | Non comestible | X |   |   |   |   |   | X |   |   |    |    |    |
| Volvariella hypophitys      | Volvaire plumeuse          | Non comestible |   |   | X |   |   |   | X |   |   |    |    |    |
| Xeromphalina campanella     | Omphale en clochette       | sans intérêt   |   |   | X | X |   |   | X | X |   |    | X  |    |
| Xeromphalina tenuipes       | Xéromphaline à pied ténu   | Sans intérêt   |   |   |   |   | X |   |   |   |   |    |    |    |
| <b>2. Chanterelles</b>      |                            |                |   |   |   |   |   |   |   |   |   |    |    |    |
| Craterellus tubaeformis     | Chanterelle en tube        | Bonne          |   |   |   |   |   |   | X | X | X | X  |    |    |
| <b>3. Bolets</b>            |                            |                |   |   |   |   |   |   |   |   |   |    |    |    |
| Boletus chippewaensis       | Cep D'Amérique             | Excellent      |   |   | X | X |   | X | X |   |   |    |    |    |
| Boletus subvelutipes        | Bolet à pied velu          | Douteux        |   |   |   | X |   |   |   |   |   |    |    |    |
| Chalciporus piperatus       | Bolet poivré               | Douteux        |   | X | X |   |   |   | X | X |   |    |    |    |
| Gyroporus cyanescens        | Bolet bleuissant           | Bon comestible |   |   |   |   |   | X |   |   |   |    |    |    |
| Hemileccinum subglabripes   | Bolet à pied glabrescent   | Bn             |   |   |   | X | X |   | X |   |   |    |    |    |
| Harrya chromapes            | Bolet à pied jaune vif     | Comestible     |   |   |   | X |   |   |   |   |   |    |    |    |
| Imleria badia               | Bolet baie                 | Comestible     |   | X |   | X |   | X |   |   |   |    |    |    |
| Leccinum atrostitipatum     | Bolet à pied noir          | Bon            |   | X |   | X |   |   | X |   |   |    |    |    |
| Leccinum aurantiacum        | Bolet orangé               | Bon            |   | X |   | X |   | X |   |   |   | X  |    |    |
| Leccinum holopus            | Bolet blanc de neige       | Comestible     |   | X | X | X | X | X | X | X | X | X  |    |    |
| Leccinum insolens           | Bolet insolite             | Comestible     |   |   |   |   |   |   | X |   |   |    |    |    |
| Leccinum melaneum           | Bolet noir                 | Comestible     |   |   |   |   |   |   | X |   |   | X  |    |    |
| Leccinum piceinum           | Bolet des épinettes        | Comestible     |   | X |   | X |   | X | X |   |   |    |    |    |
| Leccinum scabrum            | Bolet rugueux              | Comestible     |   | X |   | X |   | X | X | X |   | X  |    |    |
| Leccinum snellii            | Bolet de Snell             | Comestible     |   |   |   |   |   |   | X |   |   |    |    |    |
| Suillus acidus              | Bolet acide                | Comestible     |   |   |   |   |   |   | X |   |   |    |    |    |
| Suillus brevipes            | Bolet à pied court         | Très bon       |   | X |   | X |   | X | X | X |   |    | X  |    |
| Suillus cavipes             | Bolet à pied creux         | Comestible     |   |   |   |   |   |   |   |   |   | X  | X  |    |
| Suillus glandulosus         | Bolet glanduleux           | Médiocre       |   | X | X | X | X | X | X | X |   |    |    |    |
| Suillus neoalbidipes        | Bolet à pied blanc         | Comestible     |   | X |   |   |   | X | X | X |   |    | X  |    |
| Suillus salmonicolor        | Bolet saumon               | Comestible     |   | X |   |   |   |   | X | X |   |    |    |    |
| Suillus serotinus           | Bolet tardif               | Comestible     |   |   |   |   |   |   |   |   |   |    | X  |    |
| Suillus tomentosus          | Bolet tomenteux            | Comestible     |   |   |   |   |   | X | X |   |   |    |    |    |
| Tylopilus felleus           | Bolet amer                 | Non comestible |   | X |   |   |   |   | X | X |   |    |    |    |
| Xerocomellus chrysenteron   | Bolet à chair jaune        | Comestible     |   |   |   | X |   |   | X |   |   |    |    |    |
| Xerocomus subtomentosus     | Bolet subtamenteux         | Comestible     |   | X | X | X |   | X | X | X |   |    |    |    |
| <b>4a. Polypores</b>        |                            |                |   |   |   |   |   |   |   |   |   |    |    |    |
| Antrodia heteromorpha       | Antrodie amorphe           | Non comestible | X |   |   |   | X |   | X |   |   |    |    |    |
| Antrodia serialis           | Polypore en rangées        | Non comestible |   |   |   |   |   |   |   |   | X |    |    |    |
| Antrodia variformis         | Polypore variable          | non comestible | X |   |   |   |   |   |   |   | X |    |    |    |



| Nom latin                  | Nom français           | Comestibilité  | 1 | 2 | 3 | 4 | 5 | 6 | 7 | 8 | 9 | 10 | 11 | 12 |
|----------------------------|------------------------|----------------|---|---|---|---|---|---|---|---|---|----|----|----|
| Antrodiella semisupina     | Polypore retroussé     | Non comestible |   |   |   |   |   |   | X |   |   |    |    |    |
| Bjerkandera adusta         | Polypore brûlé         | Non comestible |   | X |   |   |   |   |   | X | X |    |    |    |
| Cerena unicolor            | Tramète unicolor       | Non comestible | X |   |   |   |   |   | X |   |   |    |    |    |
| Coltricia perennis         | Polypore persistant    | non comestible |   | X | X | X |   | X | X | X |   |    |    |    |
| Datroniella scutellata     | Tramète en bouclier    | Non comestible |   |   |   |   |   |   | X |   |   |    |    |    |
| Fomes fomentarius          | Amadouvier             | non comestible |   |   | X | X | X |   | X | X |   | X  |    |    |
| Fomitopsis pinicola        | Polypore pinicole      | non comestible | X | X | X |   | X | X | X |   | X |    |    |    |
| Fomitopsis rosea           | Polypore rose          | Non comestible |   |   |   |   |   |   |   |   | X |    |    |    |
| Ganoderma applanatum       | Polypore des artistes  | non comestible | X |   |   |   |   |   | X |   |   |    |    |    |
| Ganoderma stugae           | Polypore des pruches   | Non comestible |   |   |   |   |   |   | X |   |   |    |    |    |
| Gloeophyllum sepiarium     | Polypore des clôtures  | non comestible |   | X | X |   | X | X | X | X |   | X  |    |    |
| Gloeoporus dichrous        | Polypore bicolore      | Non comestible |   |   |   |   |   |   | X |   |   |    |    |    |
| Inonotus obliquus          | Polypore oblique       | Non comestible |   |   |   |   |   |   | X |   |   |    |    |    |
| Jahnoporus hirtus          | Polypore hérissé       | non comestible |   |   |   |   | X |   | X | X |   |    |    |    |
| Leptoporus mollis          | Polypore mou           | Non comestible |   |   | X | X |   |   | X |   |   |    |    |    |
| Loweomyces fractipes       | Polypore pied-bot      | Non comestible |   |   |   |   |   |   | X |   |   |    |    |    |
| Onnia leporina             | Polypore circiné       | Non comestible |   |   |   |   |   |   | X |   |   |    |    |    |
| Onnia tomentosa            | Polypore tomenteux     | non comestible |   |   |   |   |   |   | X |   |   |    |    |    |
| Phaeolus schweinitzii      | Polypore de Schweinitz | Non comestible |   |   |   |   |   | X |   |   |   |    |    |    |
| Phellinus aff. Alni        | Polypore des aulnes    | Non comestible |   |   |   |   |   |   | X |   |   |    |    |    |
| Phellinus cinereus         | Polypore cendré        | Non comestible |   |   |   |   |   |   | X |   |   |    |    |    |
| Phellinus nigricans        | Polypore noircissant   | non comestible | X |   |   |   | X |   |   |   | X | X  |    |    |
| Phellinus prunicola        | Polypore du cerisier   | non comestible | X |   |   |   |   |   | X |   | X |    |    |    |
| Phellinus tremulae         | Polypore du peuplier   | Non comestible |   |   |   |   |   |   |   |   | X |    |    |    |
| Piptoporus betulinus       | Polypore du bouleau    | non comestible |   |   | X |   | X |   | X | X |   |    |    |    |
| Polyporus tubaeformis      | Polypore en tube       | Non comestible |   |   |   |   |   |   |   |   |   | X  |    |    |
| Polyporus varius           | Polypore vergeté       | Non comestible |   |   |   | X |   |   | X |   |   |    |    |    |
| Porodaedalea piceina       | Polypore de l'épinette | non comestible | X |   | X |   | X |   | X |   |   |    |    |    |
| Postia alni                | Polypore de l'aulne    | Non comestible |   |   |   |   |   |   | X |   |   |    |    |    |
| Postia caesia              | Polypore bleuté        | Non comestible |   |   | X |   |   |   |   | X |   |    |    |    |
| Postia guttulata           | Polypore guttulé       | Non comestible |   |   |   |   |   |   | X |   |   |    |    |    |
| Postia ptychogaster        | Polypore anamorphe     | Non comestible |   |   |   |   |   |   | X |   |   |    |    |    |
| Postia stiptica            | Polypore styptique     | non comestible |   |   |   |   | X | X | X |   |   | X  |    |    |
| Royoporus badius           | Polypore bai           | Non comestible | X |   |   |   |   | X | X | X | X |    |    |    |
| Trametes cinnabarina       | Tramète cinabre        | Non comestible |   |   |   |   |   |   | X |   |   |    |    |    |
| Trametes ochracea          | Tramète ochracée       | Non comestible |   |   | X |   | X |   | X |   |   | X  |    |    |
| Trametes pubescens         | Polypore pubescent     | Non comestible |   |   |   |   |   |   |   |   |   | X  |    |    |
| Trametes versicolor        | Tramète versicolore    | Non comestible |   |   | X |   |   |   | X |   |   |    |    |    |
| Trichaptum fusco-violaceum | Polypore violet        | non comestible | X | X | X |   | X |   |   |   |   |    |    |    |
| Tyromyces chioneus         | Polypore blanc         | inconnue       |   | X | X | X | X | X | X | X | X | X  |    |    |
| <b>4b. Croûtes</b>         |                        |                |   |   |   |   |   |   |   |   |   |    |    |    |
| Cytidia salicina           | Corticie du saule      | Non comestible |   | X |   | X |   |   |   |   |   |    |    |    |

| Nom latin                          | Nom français                 | Comestibilité  | 1 | 2 | 3 | 4 | 5 | 6 | 7 | 8 | 9 | 10 | 11 | 12 |
|------------------------------------|------------------------------|----------------|---|---|---|---|---|---|---|---|---|----|----|----|
| Endocronartium harknessii          | Rouille tumeur autonome      | Non comestible | X |   |   |   |   |   |   |   |   |    |    |    |
| Exobasidium vaccinum augustifolium | Galle du bleuet              | Non comestible |   |   |   |   |   |   | X |   |   |    |    |    |
| Exobasidium vaccinii               | Galle de l'airelle vin d'Ida | Non comestible |   | X | X |   |   |   | X |   |   |    |    |    |
| Irpex lacteus                      | Irpes laiteux                | Non comestible |   |   |   |   |   |   | X |   |   |    |    |    |
| Peniophora leurentii               | Corticie de Laurent          | Non comestible | X |   |   |   |   | X |   |   |   |    |    |    |
| Plicatura nivea                    | Plicature blanche            | non comestible |   |   |   |   |   | X |   |   |   |    |    |    |
| Plicaturopsis crispa               | Plicature crispée            | Non comestible |   |   |   |   |   |   | X |   |   |    |    |    |
| Pseudochaete tabacina              | Stérée tabac                 | non comestible | X |   |   |   | X |   |   |   |   |    |    |    |
| Stereum hirsutum                   | Stérée hirsute               | Non comestible |   |   |   |   |   |   | X |   |   |    |    |    |
| Stereum ostrea                     | Stérée tomenteuse            | Non comestible |   |   | X |   |   |   |   |   |   |    |    |    |

### 5. Hydnes

|                       |                        |                |  |   |   |   |   |   |   |   |   |   |   |  |
|-----------------------|------------------------|----------------|--|---|---|---|---|---|---|---|---|---|---|--|
| Bankera fuligineoalba | Hydne blanc fuligineux | Non comestible |  |   |   |   |   |   |   | X |   |   |   |  |
| Bankera violascens    | Hydne violacé          | Non comestible |  |   | X |   |   |   | X | X |   |   |   |  |
| Hydnellum aurantiacum | Hydne orangé           | non comestible |  | X | X |   |   | X | X |   |   | X |   |  |
| Hydnellum caeruleum   | Hydne bleu             | non comestible |  | X |   | X |   | X | X |   |   | X | X |  |
| Hydnellum conrescens  | Hydne conrescens       | Non comestible |  |   |   |   |   | X |   |   |   |   | X |  |
| Hydnellum ferrugineum | Hydne ferrugineux      | Non comestible |  |   |   | X |   | X | X |   |   |   |   |  |
| Hydnellum peckii      | Hydne de Peck          | non comestible |  |   |   |   |   |   | X |   |   |   |   |  |
| Hydnellum suaveolens  | Hydne odorant          | Non comestible |  |   |   |   |   |   | X |   |   |   |   |  |
| Hydnum repandum       | Hydne sinué            | Bon            |  |   | X |   |   |   | X | X |   |   |   |  |
| Hydnum umbilicatum    | Hydne ombiliqué        | Bon            |  |   |   |   | X |   | X | X | X | X |   |  |
| Phelodon melaleucus   | Hydne brun noirâtre    | Non comestible |  | X |   |   |   |   |   | X |   |   |   |  |
| Phellodon niger       | Hydne noir             | Non comestible |  |   |   |   |   |   | X |   |   |   |   |  |
| Phellodon tomentosus  | Hydne tomenteux        | Non comestible |  |   | X |   |   |   | X | X |   |   |   |  |
| Sarcodon fennicus     | Hydne de Finlande      | Non comestible |  |   |   |   |   |   | X |   |   |   |   |  |
| Sarcodon imbricatus   | Hydne imbriqué         | Comestible     |  |   |   |   |   |   | X |   |   |   |   |  |
| Sarcodon scabrosus    | Hydne rugueux          | non comestible |  |   | X |   |   |   | X |   |   | X |   |  |
| Sarcodon versipellis  | Hydne changeant        | Non comestible |  |   |   |   |   |   | X |   |   |   |   |  |

### 6. Clavaires et analogues

|                             |                          |                |  |   |   |  |   |   |   |   |   |   |  |  |
|-----------------------------|--------------------------|----------------|--|---|---|--|---|---|---|---|---|---|--|--|
| Alloclavaria purpurea       | Clavaire pourpre         | Non comestible |  |   |   |  |   |   |   |   |   | X |  |  |
| Clavariadelphus ligula      | Clavaire petite langue   | Non comestible |  | X | X |  |   |   |   | X | X | X |  |  |
| Clavariadelphus pistillaris | Clavaire en pilon        | Non comestible |  |   | X |  |   |   |   |   |   |   |  |  |
| Clavulina coralloïdes       | Clavaire corail          | Inconnue       |  |   |   |  | X |   | X |   | X | X |  |  |
| Clavulina rugosa            | Clavaire rugueuse        | Comestible     |  |   |   |  |   |   | X |   |   |   |  |  |
| Clavulinopsis fusiformis    | Clavaire fusiforme       | Comestible     |  |   |   |  | X |   |   |   |   |   |  |  |
| Clavulinopsis laeticolor    | Clavaire jolie           | Non comestible |  |   |   |  |   |   | X |   | X |   |  |  |
| Ramaria flava               | Clavaire molle           | Comestible     |  |   |   |  |   | X |   | X | X |   |  |  |
| Ramaria rubripermanens      | Ramaire à pointe vineuse | Inconnue       |  |   |   |  |   |   | X |   |   |   |  |  |
| Telephora terrestris        | Théléphore terrestre     | non comestible |  |   | X |  |   |   | X | X |   | X |  |  |

### 7. Trémelles et analogues

|                            |                  |            |   |  |  |  |  |  |  |  |  |  |  |  |
|----------------------------|------------------|------------|---|--|--|--|--|--|--|--|--|--|--|--|
| Auricularia auricula-judae | Oreille de Judas | Comestible | X |  |  |  |  |  |  |  |  |  |  |  |
|----------------------------|------------------|------------|---|--|--|--|--|--|--|--|--|--|--|--|

| Nom latin                | Nom français              | Comestibilité  | 1 | 2 | 3 | 4 | 5 | 6 | 7 | 8 | 9 | 10 | 11 | 12 |
|--------------------------|---------------------------|----------------|---|---|---|---|---|---|---|---|---|----|----|----|
| Calocera cornea          | Calocère corné            | Non comestible |   |   |   |   |   | X |   |   |   |    |    |    |
| Dacrymyces chrysospermus | Trémelle palmée           | Acceptable     | X |   | X |   | X | X | X | X |   | X  |    |    |
| Dacrymices microsporus   | Trémelle à petites spores | Non comestible |   | X |   |   |   |   |   |   |   |    |    |    |
| Exidia glandulosa        | Exidie glanduleuse        | Non comestible | X |   |   |   |   |   |   |   |   |    |    |    |
| Exidia recisa            | Exidie obconique          | Non comestible | X |   |   |   |   |   |   |   |   |    |    |    |
| Pseudohydnum gelatinosum | Trémelle faux-hydne       | Comestible     |   |   |   |   | X |   | X |   |   |    |    |    |
| Tremella encephala       | Trémelle cérébriforme     | Non comestible | X | X |   |   |   |   |   |   |   |    |    |    |
| Tremella foliacea        | Trémelle foliacée         | Non comestible |   |   |   |   |   |   |   |   | X |    |    |    |
| Tremella lutescens       | Trémelle mésentérique     | Non comestible | X |   |   |   |   |   |   |   |   |    |    |    |

## 8. Gastéromycètes et analogues

|                            |                           |                |  |   |   |   |   |   |   |   |   |   |  |  |
|----------------------------|---------------------------|----------------|--|---|---|---|---|---|---|---|---|---|--|--|
| Bovista plumbea            | Boviste plombée           | Comestible     |  | X |   |   |   | X |   | X |   |   |  |  |
| Crucibulum laeve           | Crucibule lisse           | Non comestible |  | X | X |   |   |   |   | X |   |   |  |  |
| Lycoperdon molle           | Vesse-de-loup molle       | Comestible     |  |   | X | X | X |   |   | X | X | X |  |  |
| Lycoperdon nigrescens      | Vesse-de-loup noirissante | Comestible     |  |   |   |   |   |   | X | X |   |   |  |  |
| Lycoperdon perlatum        | Vesse-de-loup perlée      | Comestible     |  | X | X |   | X |   | X | X | X |   |  |  |
| Lycoperdon pyriforme       | Vesse-de-loup piriforme   | Comestible     |  |   | X | X |   |   |   | X |   | X |  |  |
| Mutinus ravenelii          | Mutin de Ravenel          | Non comestible |  | X |   |   |   | X | X |   |   |   |  |  |
| Rhizopogon roseolus        | Rhizopogon rougissant     | non comestible |  |   |   |   |   | X | X |   |   |   |  |  |
| Scleroderma citrinum       | Scléroderme commun        | Vénéneux       |  |   |   |   |   |   | X |   |   |   |  |  |
| Scleroderma septentrionale | Scléroderme septentrional | Vénéneux       |  |   |   |   |   |   | X |   |   |   |  |  |
| Sphaerobolus stellatus     | Sphéroboule étoilé        | Non comestible |  | X |   |   | X | X |   |   |   |   |  |  |

## 9. Ascomycètes

|                                 |                             |                |   |   |   |   |   |   |   |   |   |   |  |  |
|---------------------------------|-----------------------------|----------------|---|---|---|---|---|---|---|---|---|---|--|--|
| Apiosporina morbosa             | Nodule noir du cerisier     | Non comestible | X | X |   | X |   |   | X |   |   |   |  |  |
| Bisporella citrina              | Calycelle citrine           | Non comestible |   | X | X |   |   |   | X |   | X |   |  |  |
| Chlorociboria aeruginascens     | Chlorosplénie verdissante   | non comestible |   |   | X |   |   |   | X |   | X |   |  |  |
| Chlorociboria aeruginosa        | Pézize vert-de-gris         | Non comestible |   |   |   |   |   |   | X |   |   |   |  |  |
| Cudonia circinans               | Cudonie circulaire          | non comestible |   | X | X | X |   |   |   |   | X |   |  |  |
| Elaphocordyceps ophioglossiodes | Cordyceps langue-de-serpent | Non comestible |   |   |   |   |   |   | X |   |   |   |  |  |
| Elaphomyces muricatus           | Truffe du cerf muriquée     | Non comestible |   |   |   |   |   |   | X |   |   |   |  |  |
| Gyromitra ambigua               | Gyromitre ambigu            | Toxique        |   |   |   | X |   |   | X |   | X |   |  |  |
| Gyromitra esculenta             | Gyromitre commun            | Toxique        | X |   |   |   |   |   |   |   |   |   |  |  |
| Helvella lacunosa               | Helvelle lacuneuse          | Non comestible |   |   | X |   |   | X | X | X | X |   |  |  |
| Hypocreopsis lichenoides        | Hypocrée lichenoïde         | Non comestible | X |   | X |   |   |   | X |   |   |   |  |  |
| Hypomyces chrysospermus         | Dermatose des bolets        | non comestible |   | X | X | X | X |   | X | X |   |   |  |  |
| Hypomyces lactifluorum          | Dermatose des russules      | Comestible     |   |   |   | X |   | X | X |   |   |   |  |  |
| Hypomyces lateritius            | Dermatose couleur de brique | Non comestible |   |   |   |   |   |   | X |   |   |   |  |  |
| Hypomyces ochraceus             | Dermatose ochracée          | non comestible |   |   | X | X | X |   |   | X |   | X |  |  |
| Hypoxylon fragiforme            | Hypoxyle en forme de fraise | Non comestible |   |   |   |   |   |   | X |   |   |   |  |  |
| Hypoxylon fuscum                | Hypoxylon                   | Non comestible | X |   |   |   |   |   |   |   |   |   |  |  |
| Isaria farinosa                 | Isaria farineuse            | Non comestible |   |   |   |   |   |   | X |   |   |   |  |  |
| Lachnellula agassizii           | Pézize d'Agassiz            | sans intérêt   | X |   | X |   | X |   | X |   |   |   |  |  |

| Nom latin                 | Nom français                                         | Comestibilité   | 1  | 2  | 3   | 4  | 5  | 6  | 7   | 8   | 9  | 10 | 11 | 12 |
|---------------------------|------------------------------------------------------|-----------------|----|----|-----|----|----|----|-----|-----|----|----|----|----|
| Leotia lubrica            | Léotie lubrique                                      | Comestible      |    |    |     |    | X  |    | X   | X   | X  | X  |    |    |
| Leotia viscosa            | Léotie visqueuse                                     | Comestible      |    |    |     |    |    |    | X   |     | X  |    |    |    |
| Microstoma protractum     | Pézize alpine                                        | Non comestible  | X  |    |     |    |    |    |     |     |    |    |    |    |
| Mitrulela elegans         | Mitrule élégante                                     | Non comestible  | X  |    |     |    |    |    |     |     |    |    |    |    |
| Neolecta irregularis      | Mitrule irrégulière                                  | Comestible      |    |    |     |    |    |    |     | X   | X  | X  |    |    |
| Neolecta vitellina        | Mitrule jaune d'oeuf                                 | Comestible      |    |    | X   |    |    |    | X   |     |    | X  |    |    |
| Octospora humosa          | Pézize terreuse                                      | Non comestible  |    |    | X   |    |    |    |     |     |    |    |    |    |
| Otidea alutacea           | Oreille alutacée                                     | Non comestible  |    |    |     |    |    |    |     | X   |    |    |    |    |
| Peziza badia              | Pézize baie                                          | Non comestible  |    |    |     |    |    |    | X   |     |    |    |    |    |
| Peziza phyllogena         | Pézize olivâtre                                      | Non comestible  |    |    |     |    |    |    |     |     | X  |    |    |    |
| Peziza repanda            | Pézize recourbée                                     | Comestible      |    |    | X   | X  |    |    |     |     |    | X  |    |    |
| Pseudoplectania nigrella  | Plectanie noire                                      | Non comestible  | X  |    |     |    |    |    |     |     |    |    |    |    |
| Sarcosoma globosum        | Pézize globuleuse                                    | Non comestible  | X  |    |     |    |    |    |     |     |    |    |    |    |
| Scutellinia scutellata    | Pézize en bouclier                                   | sans intérêt    |    |    |     |    |    |    | X   |     |    |    |    |    |
| Spatularia velutipes      | Spatulaire à pied velouté                            | Non comestible  |    | X  |     |    |    |    |     |     |    |    |    |    |
| Taphrina robinsoniana     | Galle du chaton de l'aulne                           | non comestible  |    |    | X   |    |    |    | X   |     |    |    |    |    |
| Urnula craterium          | Urnule cratériforme                                  | Non comestible  | X  |    |     |    |    |    |     |     |    |    |    |    |
| Vibrissia truncorum       | Vibrisse des branches                                | Non comestible  | X  |    |     |    | X  |    |     |     |    |    |    |    |
| <b>12. Myxomycètes</b>    |                                                      |                 |    |    |     |    |    |    |     |     |    |    |    |    |
| Arcyria denudata          | Arcyrie dénudée                                      | Non comestible  |    |    |     |    |    |    | X   |     |    |    |    |    |
| Arcyria obvelata          | Arcyrie enveloppée                                   | Non comestible  |    |    |     |    |    |    | X   |     |    |    |    |    |
| Ceratiomixa fruticulosa   | Buisson cireux                                       | Non comestible  |    | X  |     |    |    |    |     |     |    |    |    |    |
| Endogone pisiformis       | Endogone pisiforme                                   | Non comestible  |    |    |     |    |    |    | X   |     |    |    |    |    |
| Fuligo septica            | Fleur de tan                                         | sans intérêt    |    | X  | X   | X  | X  | X  | X   |     | X  |    |    |    |
| Fuligo septica var. flava | Fleur de tan, variété jaune                          | Non comestible  |    |    |     |    |    |    | X   |     |    |    |    |    |
| Hemitrichia calyculata    | Hemitrichie petite coupe                             | Non comestible  |    |    |     | X  |    |    |     |     |    |    |    |    |
| Lycogala epidendrum       | Lycogale du bois                                     | Non comestible  | X  |    | X   |    |    |    |     |     | X  |    |    |    |
| Mucilago crustacea        | Mucus crouté                                         | Non comestible  |    | X  |     |    | X  |    |     |     |    |    |    |    |
| Physarum virescens        | Physare verdoyant                                    | Non dcomestible |    |    |     |    |    |    | X   |     |    |    |    |    |
| Stemonitis fusca          | Stémonite brun foncé                                 | Non comestible  |    |    | X   | X  |    |    |     |     | X  |    |    |    |
| <b>Total saison : 422</b> | <b>Nombre d'espèces récoltées lors de la sortie:</b> |                 | 41 | 85 | 106 | 88 | 87 | 91 | 282 | 107 | 83 | 88 | 36 |    |
