# Supplementary material
Source: MDPI journal article supplement (https://www.mdpi.com/1999-4907/12/9/1247)
Supplement: s1 [file s1]

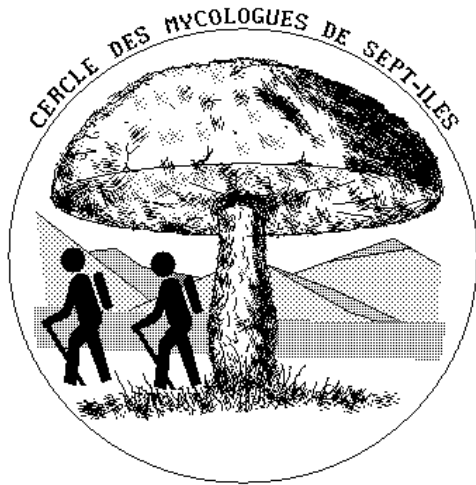

# Le champignon boréal

**Bulletin du Cercle des mycologues de Sept-Îles**

**Vol.15, no 2, oct. 2014**

Président: Gilles St-Amand  
Vice-prés.: André Gallant  
Secrétaire: Michèle Bergeron  
Trésorière: Sherley Renaud  
Administrateur : Maryse Forest Tremblay

---

## MOT DU PRÉSIDENT

Notre dix-neuvième année de mycologie qui se termine. Douze sorties régulières nous ont permis de récolter 347 espèces différentes. Dans le bulletin je n'ai pas tenu compte du changement de nom d'un bon nombre de champignons car ces anciens noms correspondent à ceux inscrits dans notre site internet et aussi de nombreux livres de mycologie.

Une année assez fructueuse car les pluies étaient au rendez-vous et quelques sorties eurent lieu dans la pluie. Les chanterelles en tubes furent cette année très abondantes et quelques sorties de septembre ont permis à plusieurs membres de ramasser de grands paniers de ces chanterelles. Les tricholomes à grand voile (matsutake) n'étaient pas très abondants à notre sortie sous les pins gris mais une poussée abondante s'est produite au mois d'octobre après la fin de nos activités. Pour notre exposition annuelle aux Galeries Montagnaises le 23 août, il y avait 227 espèces de champignons sur les tables.

Le printemps dernier nous avons offert un cours d'initiation à la mycologie ainsi qu'un exposé sur les champignons comestibles de Sept-Îles à la même occasion.

L'année prochaine nous fêterons le 20<sup>ième</sup> anniversaire de fondation de notre cercle et en septembre prochain nous serons les hôtes de la rencontre provinciale des mycologues. Nous aurons à organiser cette rencontre et nous avons besoin de l'aide de nos membres pour que la rencontre soit une réussite

Mercredi le 26 novembre prochain nous tiendrons notre réunion annuelle au centre Socio-culturel à 19 heures 30. Les membres présents auront l'occasion de discuter des orientations futures du cercle et leurs idées et suggestions seront les bienvenues.

Gilles St Amand

# Inventaire des récoltes de la saison 2014

par Gilles St Amand

|     | <u>Date</u>  | <u>Lieu</u>                                                             | <u>Responsable</u> |
|-----|--------------|-------------------------------------------------------------------------|--------------------|
| 1.  | 14 juin      | Première sortie : Voie ferrée du chemin du lac Daigle                   | Gilles St Amand    |
| 2.  | 19 juillet   | Deuxième sortie: Piste de ski de fond du Club Rapido                    | Gilles St Amand    |
| 3.  | 26 juillet   | Troisième sortie: Premier chenil                                        | Gilles St Amand    |
| 4.  | 2 août       | Quatrième sortie: Chemin du Lac Daigle                                  | Gilles St Amand    |
| 5.  | 9 août       | Cinquième sortie: Chemin du Lac Daigle, près du 3 <sup>ème</sup> chenil | G. St Amand        |
| 6.  | 23 août      | Sixième sortie: Exposition Galeries Montagnaises                        | Membres du C.A.    |
| 7.  | 24 août      | Septième sortie: Îles Grande Basques                                    | Membres du C.A.    |
| 8.  | 6 septembre  | Huitième sortie: Voie ferrée, chemin du Lac Dalgle                      | A. Gallant         |
| 9.  | 13 septembre | Neuvième sortie: Forêt de pins gris                                     | G. St Amand        |
| 10. | 20 septembre | Dixième sortie: Chemin du Lac Daigle, près du 3 <sup>ème</sup> Chenil   | M. F. Tremblay     |
| 11. | 27 septembre | Onzième sortie: Voie ferrée du chemin du Lac Daigle,                    | A. Gallant         |
| 12. | 5 octobre    | Douzième sortie: Chemin du Lac Daigle                                   | G. St Amand        |

| Nom latin                               | Nom français                 | Comestibilité  | 1 | 2 | 3 | 4 | 5 | 6 | 7 | 8 | 9 | 10 | 11 | 12 |
|-----------------------------------------|------------------------------|----------------|---|---|---|---|---|---|---|---|---|----|----|----|
| <b>1. Agarics (champignons à lames)</b> |                              |                |   |   |   |   |   |   |   |   |   |    |    |    |
| Agaricus arvensis                       | Agaris des jachères          | Excellent      |   |   |   |   |   |   |   | X |   |    |    | X  |
| Agaricus campestris                     | Agaric champêtre             | Excellent      |   |   |   |   |   |   |   | X |   |    |    |    |
| Agaricus diminutivus                    | Psaliote diminuée            | Comestible     |   |   |   |   |   |   |   |   |   |    |    | X  |
| Agaricus sylvicola                      | Psallote des bois            | Bon comestible |   |   |   |   | X | X |   |   |   | X  |    |    |
| Agrocybe praecox                        | Agrocybe printanier          | Comestible     |   | X |   |   |   |   |   |   |   |    |    |    |
| Amanita citrina                         | Amanite citrine              | Non comestible |   |   |   | X | X | X |   |   |   |    |    |    |
| Amanita flavoconia                      | Amanite à voile jaune        | Suspectée      |   |   |   | X |   | X |   |   | X |    |    |    |
| Amanita fulva                           | Amanite fauve                | Comestible     |   |   |   | X | X | X | X |   |   |    |    |    |
| Amanita muscaria Gussowii               | Amanite tue-mouches          | Vénéneuse      |   | X | X | X | X | X |   |   | X | X  |    |    |
| Amanita porphyria                       | Amanite porphyre             | Suspectée      |   |   |   |   | X | X | X | X | X | X  | X  |    |
| Amanita sinocoflava                     | Amanite jaune paille         | Comestible     |   |   |   |   | X |   |   |   |   |    |    |    |
| Amanita vaginata var. alba              | Amanite vaginée var. blanche | Non comestible |   |   |   |   |   |   | X |   |   |    |    |    |
| Amanita Ristichii                       | Amanite de Rishtich          | Non comestible |   |   | X |   |   |   |   |   |   | X  |    |    |
| Amanita wellsii                         | Amanite de Wells             | Douteuse       |   |   |   |   |   | X |   | X |   |    |    |    |
| Cantharellula umbonata                  | Clitocybe omboné             | Bon            |   |   |   |   |   | X |   |   | X | X  |    |    |
| Catathelasma ventricosa                 | Armillaire ventru            | Bon            |   |   |   |   |   |   |   |   |   |    |    | X  |
| Cheimonophyllum candissimum             | Pleurote blanc pur           | Non comestible |   |   |   |   |   | X |   |   |   |    |    |    |
| Chroogomphus rutilus                    | Gomphide rutilant            | Comestible     |   |   |   |   |   |   |   |   | X |    |    |    |
| Chroogomphus vinicolor                  | Gomphide vineux              | Comestible     |   |   |   |   |   |   |   | X | X |    |    |    |
| Clitocybe clavipes                      | Clitocybe à pied renflé      | Comestible     |   |   |   |   | X | X | X |   | X | X  | X  | X  |
| Clitocybe gibba                         | Clitocybe en entonnoir       | Comestible     |   |   |   |   |   |   |   | X |   |    |    |    |
| Clitocybe odora                         | Clitocybe odorant            | Comestible     |   |   |   |   |   | X |   |   | X |    |    |    |
| Clitocybe squamulosa                    | Clitocybe squamuleux         | Comestible     |   | X |   | X | X | X |   |   |   |    | X  |    |
| Clitocybula familia                     | Collybie familiale           | Non comestible |   |   |   |   |   |   |   | X |   |    |    | X  |
| Clitopilus prunulus                     | Clitopile petite prune       | Comestible     |   |   |   | X |   | X |   |   |   |    |    |    |
| Collybia tuberosa                       | Collybie à sclérote          | sans intérêt   |   |   |   |   |   | X | X |   |   | X  |    |    |

| Nom latin                             | Nom français                 | Comestibilité  | 1 | 2 | 3 | 4 | 5 | 6 | 7 | 8 | 9 | 10 | 11 | 12 |
|---------------------------------------|------------------------------|----------------|---|---|---|---|---|---|---|---|---|----|----|----|
| Conocybe lactea                       | Conocybe blanc de lait       | Sans intérêt   |   | X |   |   |   |   |   |   |   |    |    |    |
| Coprinus atramentarius                | Coprin noir d'encre          | Comestible     |   |   |   |   |   | X |   |   | X | X  |    |    |
| Coprinus impatiens                    | Coprin fausse psatyrelle     | Non comestible | X |   |   |   |   |   |   |   |   |    |    |    |
| Coprinus lagopides                    | Coprin faux pied de lièvre   | Non comestible |   |   |   |   | X |   |   |   |   |    |    |    |
| Coprinus micaceus                     | Coprin micacé                | Comestible     |   | X |   |   |   |   |   |   |   |    |    |    |
| Cortinarius acutus                    | Cortinaire pointu            | Inconnue       |   |   |   |   |   | X |   | X |   | X  |    |    |
| Cortinarius alboviolaceus             | Cortinaire blanc-violet      | Inconnue       |   |   |   |   |   |   |   | X | X | X  | X  |    |
| Cortinarius angelesianus              | Cortinaire à tête velue      | Non comestible |   |   |   |   |   | X |   |   |   |    |    |    |
| Cortinarius armeniacus                | Cortinaire d'Arménie         | Non comestible |   |   |   |   |   |   |   |   |   | X  |    |    |
| Cortinarius armillatus                | Cortinaire à bracelets       | Comestible     |   |   |   |   |   | X |   | X |   | X  | X  | X  |
| Cortinarius anomalus                  | Cortinaire bleu ciel         | Non comestible |   |   |   |   |   | X |   | X | X | X  |    | X  |
| Cortinarius biformis                  | Cortinaire à deux formes     | Non comestible |   |   |   |   |   | X |   |   |   |    |    |    |
| Cortinarius bolaris                   | Cortinaire rouge-brique      | Non comestible |   |   |   |   | X |   |   |   |   | X  |    |    |
| Cortinarius brunneus var. brunneus    | Cortinaire brun              | Inconnue       |   |   |   |   | X | X |   | X | X | X  | X  | X  |
| Cortinarius brunneus var. glandicolor | Cortinaire brun de gland     | Inconnue       |   |   |   |   |   | X |   | X |   | X  |    | X  |
| Cortinarius camphoratus               | Cortinaire puant             | non recommandé |   |   |   |   |   | X |   | X | X | X  |    |    |
| Cortinarius caninus                   | Cortinaire des chiens        | Non comestible |   |   |   |   |   | X |   |   | X | X  |    |    |
| Cortinarius caperatus                 | Pholiote ridée               | Inconnue       |   |   | X | X | X | X | X |   |   |    | X  |    |
| Cortinarius causticus                 | Cortinaire amer              | Non comestible |   |   |   |   |   | X |   |   | X | X  |    | X  |
| Cortinarius chrysolitus               | Cortinaire à lames olives    | Inconnue       |   |   | X | X |   | X | X |   |   |    |    |    |
| Cortinarius claricolor                | Cortinaire clair             | Non comestible |   |   |   |   | X |   |   |   |   |    |    |    |
| Cortinarius collinitus                | Cortinaire des collines      | non comestible |   |   |   | X |   | X | X | X |   | X  |    |    |
| Cortinarius evernius                  | Cortinaire humide            | Inconnue       |   | X | X | X | X | X | X | X |   |    | X  |    |
| Cortinarius flexipes                  | Cortinaire à pied tortueux   | Inconnue       |   |   | X | X |   | X |   | X |   |    |    |    |
| Cortinarius flexipes var. flabellus   | Cortinaire pélargonié        | Inconnue       |   |   |   |   |   | X | X |   |   |    |    |    |
| Cortinarius fulvoocrescens            | Cortinaire fauve ocré        | Inconnue       |   |   |   |   |   | X |   |   |   | X  |    | X  |
| Cortinarius huronensis                | Cortinaire huron             | Inconnue       |   |   |   |   | X | X | X |   | X | X  |    | X  |
| Cortinarius imbutus                   | Cortinaire imbus             | Inconnue       |   |   |   |   |   | X |   |   |   |    |    |    |
| Cortinarius incognitus                | Cortinaire incognito         | Inconnue       |   |   |   |   |   | X | X |   |   |    |    |    |
| Cortinarius limonius                  | Cortinaire citrin            | Inconnue       |   |   |   |   |   | X |   | X |   |    |    |    |
| Cortinarius laniger                   | Cortinaire laineux           | Inconnue       |   |   |   |   |   | X |   |   |   |    |    |    |
| Cortinarius malachius                 | Cortinaire canescent         | Inconnue       |   |   |   |   |   | X |   | X | X | X  | X  |    |
| Cortinarius malicorius                | Cortinaire à lames orange    | Inconnue       |   |   |   | X |   | X | X | X | X | X  |    | X  |
| Cortinarius mucosus                   | Cortinaire muqueux           | Inconnue       |   |   |   |   |   | X |   | X | X | X  |    | X  |
| Cortinarius multiformis               | Cortinaire variable          | Inconnue       |   |   |   |   | X | X | X | X |   | X  | X  | X  |
| Cortinarius paraguayensis             | Cortinaire à bracelet rouge  | Inconnue       |   | X |   |   |   | X |   |   |   |    |    |    |
| Cortinarius pholideus                 | Cortinaire écaillé           | Inconnue       |   |   |   |   |   | X |   |   |   |    |    |    |
| Cortinarius pluvius                   | Cortinaire pluvieux          | Inconnue       |   |   |   |   |   | X |   |   |   |    |    |    |
| Cortinarius sanguineus                | Cortinaire sanguin           | non comestible |   |   |   |   |   | X | X | X |   | X  | X  |    |
| Cortinarius scaurus                   | Cortinaire à pied-bot        | Non comestible |   |   |   |   |   | X |   |   |   |    |    |    |
| Cortinarius semisanguineus            | Cortinaire moitié rouge sang | Suspecté       |   |   |   |   |   | X | X |   | X | X  | X  | X  |

| Nom latin                 | Nom français                 | Comestibilité  | 1 | 2 | 3 | 4 | 5 | 6 | 7 | 8 | 9 | 10 | 11 | 12 |
|---------------------------|------------------------------|----------------|---|---|---|---|---|---|---|---|---|----|----|----|
| Cortinarius spagnophilus  | Cortinaire des spaignes      | non comestible |   |   |   |   |   | X |   |   |   |    |    | X  |
| Cortinarius traganus      | Cortinaire à odeur de poire  | Suspecté       |   |   |   |   |   |   |   |   | X | X  |    | X  |
| Cortinarius trivialis     | Cortinaire grassex           | Inconnue       |   |   |   |   |   |   |   |   |   |    |    | X  |
| Cortinarius violaceus     | Cortinaire violet            | Comestible     |   |   |   |   |   | X |   |   |   |    |    |    |
| Cystoderma amianthinum    | Cystoderme amiantacé         | non recommandé |   |   |   |   |   |   |   | X |   | X  |    | X  |
| Cystoderma granulorum     | Cystoderme granuleux         | Non recommandé |   |   |   |   |   | X |   |   |   | X  |    |    |
| Entoloma bicolor          | Entolome bicolor             | Vénéneux       |   |   |   |   |   | X |   |   |   |    |    | X  |
| Entoloma nidorum          | Entolome nitreux             | Vénéneux       |   |   |   |   |   |   |   | X |   |    |    | X  |
| Entoloma rhodopolium      | Entolome gris rosâtre        | Vénéneux       |   |   |   |   |   | X |   |   |   |    |    |    |
| Entoloma sinuatum         | Entolome sinué               | Vénéneux       |   |   |   |   | X |   |   |   |   |    |    |    |
| Gomphidius glutinosus     | Gomphide glutineux           | Comestible     |   |   |   | X | X | X | X |   | X | X  |    | X  |
| Gymnopilus penetrans      | Gymnopile aromatique         | Non comestible |   |   | X | X | X | X | X | X | X | X  |    | X  |
| Gymnopilus luteus         | Gymnopile remarquable        | Hallucinogène  |   |   |   |   |   | X | X |   |   | X  |    | X  |
| Gymnopus acervatus        | Collybie en touffes          | Médiocre       |   |   |   |   |   | X | X |   |   | X  | X  |    |
| Gymnopus confluens        | Collybie confluente          | Comestible     |   |   |   |   |   | X | X | X |   | X  | X  |    |
| Gymnopus dryophilus       | Collybie des chênes          | Comestible     |   | X |   | X | X | X | X | X | X |    |    | X  |
| Hebeloma crustuliniforme  | Hébélome croute de pain      | Toxique        |   |   |   |   |   |   |   |   | X | X  |    | X  |
| Hebeloma mesophaeum       | Hébélome à centre brun       | Suspecté       |   |   |   |   |   |   |   | X |   |    |    |    |
| Hygrocybe cantharellus    | Hygrophore chanterelle       | Inconnue       |   |   |   |   |   |   | X | X |   |    |    |    |
| Hygrocybe chlorophana     | Hygrophore à lames orangé    | Non recommandé |   |   |   |   |   |   |   | X |   |    |    |    |
| Hygrocybe coccinea        | Hygrophore rouge cramoisie   | Comestible     |   |   |   |   |   |   |   | X |   |    |    |    |
| Hygrocybe conica          | Hygrophore conique           | Non comestible |   |   |   |   |   |   |   | X | X |    |    |    |
| Hygrocybe laeta           | Hygrophore poisseux          | Comestible     |   |   |   |   |   | X |   |   |   |    |    |    |
| Hygrocybe marginata       | Hygrophore à lames marginées | Comestible     |   |   |   |   |   | X | X | X |   |    |    |    |
| Hygrocybe miniata         | Hygrophore vermillon         | Comestible     |   |   |   |   |   | X |   | X | X |    | X  |    |
| Hygrocybe virginea        | Hygrophore blanc de neige    | Comestible     |   |   |   |   |   |   |   |   | X |    |    | X  |
| Hygrophoropsis aurantiaca | Clitocybe orangé             | Comestible     |   |   |   |   |   | X | X | X | X | X  |    | X  |
| Hygrophorus hypothejus    | Hygrophore à lames soufrées  | Comestible     |   |   |   |   |   |   |   | X |   |    |    |    |
| Hygrophorus olivaceolus   | Hygrophore blanc violacé     | Comestible     |   |   |   |   |   |   |   |   |   |    |    | X  |
| Hygrophorus ponderatus    | Hygrophore des pins          | Inconnue       |   |   |   |   |   |   |   | X |   |    |    |    |
| Hygrophorus pudorus       | Hygrophore pudibond          | Non comestible |   |   |   |   |   |   |   |   |   |    |    | X  |
| Hygrophorus speciosus     | Hygrophore remarquable       | Comestible     |   |   |   |   |   |   |   |   |   |    |    | X  |
| Hypholoma capnoides       | Hypholome à lames enfumées   | Non comestible |   |   |   |   |   | X | X |   |   | X  | X  | X  |
| Hypholoma radicosum       | Hypholome radicaant          | Non comestible |   |   |   |   |   | X |   |   |   |    |    |    |
| Hypholoma udum            | Hypholome mouillé            | Non comestible |   |   |   |   |   |   |   | X |   |    |    |    |
| Inocybe geophylla         | Inocybe blanc                | Vénéneux       |   |   |   |   |   | X |   | X |   | X  | X  | X  |
| Inocybe lacera            | Inocybe lacéré               | Vénéneux       |   | X | X | X | X | X | X |   | X | X  |    |    |
| Inocybe lanuginosa        | Inocybe laineux              | Toxique        |   |   | X | X |   |   |   |   | X |    |    |    |
| Inocybe mixtilis          | Inocybe en tabouret          | Toxique        |   | X |   | X | X | X |   |   |   |    | X  |    |
| Inocybe rimosa            | Inocybe rimeux               | Toxique        |   |   |   |   |   |   |   |   |   | X  |    |    |
| Laccaria bicolor          | Laccaria bicolore            | Comestible     |   | X |   | X | X | X | X |   | X | X  |    | X  |
| Laccaria laccata ss.lato  | Laccaria laqué               | Comestible     |   |   |   |   |   |   |   |   |   |    | X  |    |

| Nom latin                  | Nom français              | Comestibilité  | 1 | 2 | 3 | 4 | 5 | 6 | 7 | 8 | 9 | 10 | 11 | 12 |
|----------------------------|---------------------------|----------------|---|---|---|---|---|---|---|---|---|----|----|----|
| Laccaria longipes          | Laccaire à long pied      | Comestible     |   |   |   |   | X | X |   | X |   | X  |    |    |
| Laccaria nobilis           | Laccaire noble            | Comestible     |   |   | X |   | X | X |   | X |   | X  |    |    |
| Laccaria striatula         | Laccaire strié            | Inconnue       |   |   |   |   |   | X |   |   | X |    |    |    |
| Lactarius affinis          | Lactaire affine           | non comestible |   |   |   | X | X | X | X | X | X | X  |    | X  |
| Lactarius camphoratus      | Lactaire camphré          | Non comestible |   |   |   |   |   | X |   |   |   | X  |    |    |
| Lactarius deceptivus       | Lactaire décevant         | non comestible |   |   | X | X | X | X | X | X |   | X  |    |    |
| Lactarius deterrimus       | Lactaire des épinettes    | Bon            |   |   |   |   | X | X |   | X |   | X  |    |    |
| Lactarius glysius          | Lactaire odorant          | non comestible |   |   |   |   |   | X | X | X | X |    |    |    |
| Lactarius helvus           | Lactaire à odeur d'érable | non comestible |   |   |   |   | X | X | X |   |   |    |    | X  |
| Lactarius lignyotus        | Lactaire couleur de suie  | Excellent      |   |   |   | X | X | X | X | X | X | X  |    | X  |
| Lactarius mammosus         | Lactaire de Hibbard       | Douteux        |   |   |   |   |   | X | X |   | X | X  |    | X  |
| Lactarius mucidus          | Lactaire muqueux          | non comestible |   |   |   |   | X | X |   | X | X |    |    |    |
| Lactarius nitidus          | Lactaire brillant         | non comestible |   |   | X |   |   | X |   |   | X | X  |    |    |
| Lactarius paradoxus        | Lactaire paradoxal        | Non comestible |   |   |   |   |   |   |   |   | X |    |    |    |
| Lactarius pubescens        | Lactaire pubescent        | Non comestible |   |   |   |   |   |   |   |   |   | X  |    |    |
| Lactarius resimus          | Lactaire retroussé        | non comestible |   |   |   |   | X | X |   |   |   | X  |    |    |
| Lactarius rufus            | Lactaire roux             | Vénéneux       |   |   |   |   | X | X | X |   | X | X  |    | X  |
| Lactarius tabidus          | Lactaire à lait soufre    | non comestible |   |   |   | X | X | X | X |   |   |    | X  |    |
| Lactarius torminosus       | Lactaire à toison         | Vénéneux       |   |   |   |   |   |   |   | X |   | X  |    |    |
| Lactarius trivialis        | Lactaire trivial          | non comestible |   |   |   |   | X | X |   |   | X |    |    |    |
| Lactarius turpis           | Lactaire sordide          | non comestible |   |   |   |   |   | X | X |   | X |    |    |    |
| Lactarius uvidus           | Lactaire raisin           | Suspecté       |   |   |   |   |   |   |   | X |   | X  |    |    |
| Lentinellus flabelliformis | Lentinelle en éventail    | Non comestible |   |   |   |   |   | X | X |   |   |    |    | X  |
| Leucoagaricus leucothites  | Lépiote lisse             | Bon comestible |   |   |   |   |   |   |   |   | X |    |    |    |
| Lyophyllum connatum        | Lyophylle conné           | Comestible     |   |   |   |   |   |   |   | X |   |    |    |    |
| Lyophyllum decastes        | Lyophylle en touffe       | Comestible     |   |   |   |   |   |   |   |   |   | X  |    |    |
| Marasmius androsaceus      | Marasme androsacé         | Non comestible |   |   |   |   | X |   |   |   |   |    |    |    |
| Marasmius oreades          | Marasme des Oréades       | Excellent      | X | X | X | X | X | X |   | X | X | X  | X  |    |
| Marasmius scorodonius      | Marasme a odeur d'ail     | Comestible     |   |   |   |   | X |   |   |   |   |    |    |    |
| Mycena abramsii            | Mycène printanière        | Inconnue       | X |   |   |   |   |   |   |   |   |    |    |    |
| Mycena hematopus           | Mycène à pied rouge       | Inconnue       |   |   |   |   |   |   |   | X |   | X  |    |    |
| Mycena leaiana             | Mycène de Léa             | Inconnue       |   |   | X |   |   |   |   |   |   |    |    |    |
| Mycena leptcephala         | Mycène chlorée            | non comestible |   | X |   |   |   | X |   |   |   |    |    |    |
| Mycena pura                | Mycène pure               | non comestible |   |   |   |   |   | X |   |   |   |    |    |    |
| Nolanea strictior          | Nolanie étroite           | Toxique        | X | X | X |   |   |   |   | X |   |    |    |    |
| Panellus stypticus         | Panelle astringente       | non comestible |   |   |   |   | X | X |   | X |   | X  |    |    |
| Panaeolus foenisecii       | Panéolle des foin coupés  | Non comestible |   |   |   |   | X | X |   |   |   | X  |    |    |
| Paxillus involutus         | Paxille enroulé           | Toxique        |   |   |   |   |   | X | X | X | X | X  | X  |    |
| Philotopsis nidulans       | Pleutore petit nid        | Médiocre       |   |   |   |   |   | X |   |   |   |    |    |    |
| Pholiota flammans          | Pholiote enflammée        | Non comestible |   |   |   |   | X |   |   |   |   |    |    |    |
| Pholiota highlandensis     | Pholiote des brulis       | Non comestible | X |   |   |   |   |   |   |   |   |    |    |    |
| Pholiota squarrosa         | Pholiote écailleuse       | Non comestible |   |   |   |   |   |   | X |   |   | X  |    |    |

| Nom latin                   | Nom français                   | Comestibilité  | 1 | 2 | 3 | 4 | 5 | 6 | 7 | 8 | 9 | 10 | 11 | 12 |
|-----------------------------|--------------------------------|----------------|---|---|---|---|---|---|---|---|---|----|----|----|
| Pholiota spumosa            | Pholiote écumeuse              | Non comestible |   |   |   |   |   |   |   |   | X |    |    |    |
| Pleurocybella porrigens     | Pleurote étalé                 | Bon            |   |   |   |   |   | X | X | X |   | X  | X  | X  |
| Pluteus cervinus            | Plutée couleur de cerf         | Comestible     |   |   |   |   | X | X |   | X |   | X  |    | X  |
| Pluteus patasatus           | Plutée patricien               | Médiocre       |   |   |   |   |   | X |   |   |   |    |    |    |
| Psathyrella candolleana     | Psathyrelle de Decandolle      | Comestible     |   |   |   |   |   | X |   | X | X |    |    |    |
| Psatyrella spadicea         | Psatyrelle baie                | Non comestible |   |   |   | X |   |   |   |   |   |    |    |    |
| Rhodocollybia butyracea     | Collybie butyracée             | Comestible     |   |   |   |   |   | X | X | X |   | X  |    | X  |
| Rhodocollybia maculata      | Collybie maculée               | Comestible     |   |   | X | X |   | X | X |   | X |    |    |    |
| Rhodocollybia scorzonerea   | Collybie maculée var jaunâtre  | Médiocre       |   |   |   | X |   |   | X |   |   |    |    |    |
| Rickenella fibula           | Mycène épingle                 | Non comestible |   |   |   |   |   | X |   |   |   | X  | X  |    |
| Russula abietina            | Russule des sapins             | non comestible |   | X | X |   |   | X |   |   |   |    | X  |    |
| Russula adusta              | Russule brûlée                 | Suspectée      |   |   | X |   | X | X |   |   |   | X  |    |    |
| Russula albonigra           | Russule noircissante           | Non comestible |   |   |   | X |   |   |   |   |   |    |    |    |
| Russula aeruginea           | Russule vert-de-gris           | Bonne          |   |   | X | X | X | X | X | X | X | X  | X  | X  |
| Russula aquosa              | Russule aqueuse                | non recommandé |   |   | X | X | X | X | X | X |   | X  |    | X  |
| Russula brevipes            | Russule à pied court           | Comestible     |   |   |   | X | X | X | X |   |   | X  |    |    |
| Russula brevipes var acrior | Russule à pied court var verte | Comestible     |   | X | X |   |   | X |   |   |   |    | X  |    |
| Russula brunneola           | Russule brune                  | Bonne          |   |   | X | X | X | X | X | X |   | X  | X  | X  |
| Russula claroflava          | Russule jaune clair            | Comestible     |   |   |   | X | X | X | X |   |   |    |    |    |
| Russula decolorans          | Russule décolorée              | Comestible     |   |   |   | X | X | X | X |   | X |    |    |    |
| Russula eloades             | Russule vert olive             | Bon comestible |   |   |   |   |   | X |   |   |   |    |    |    |
| Russula emetica             | Russule émétique               | non comestible |   |   | X | X | X | X |   | X |   | X  | X  | X  |
| Russula fragilis            | Russule fragile                | non comestible |   |   | X | X | X | X | X | X | X | X  | X  | X  |
| Russula fulvescens          | Russule fauvâtre               | Inconnue       |   |   |   | X | X | X | X |   |   |    |    |    |
| Russula leuocerasi          | Russule laurier-cerise         | Non comestible |   |   |   |   | X |   |   |   |   |    |    |    |
| Russula nigrodisca          | Russule à centre noir          | non comestible |   |   |   | X |   | X | X | X |   |    |    |    |
| Russula paludosa            | Russule des marais             | Comestible     |   | X | X |   | X | X | X | X | X | X  |    |    |
| Russula peckii              | Russule de Peck                | Bonne          |   |   |   |   |   | X | X |   |   |    |    |    |
| Russula pulchella           | Russule blanchissante          | Inconnue       |   |   |   |   |   |   |   |   | X |    |    |    |
| Russula silvicola           | Russule des forêts             | On comestible  |   |   |   |   |   | X | X |   |   |    |    |    |
| Russula xerampelina         | Russule feuille morte          | assez bonne    |   | X | X | X |   | X | X |   | X |    |    |    |
| Sarcomixa serotina          | Pleurote d'hiver               | Comestible     |   |   |   |   |   |   |   |   |   |    |    | X  |
| Stropharia hornemannii      | Strophaire lacérée             | Inconnue       |   |   |   |   |   |   |   |   |   |    |    | X  |
| Tricholoma aestuans         | Trocholome amer                | Non comestible |   |   |   |   |   |   |   |   |   |    |    | X  |
| Tricholoma davisiae         | Tricholome de Davis            | Inconnue       |   |   |   |   |   | X |   |   | X |    |    |    |
| Tricholoma equestre         | Tricholome équestre            | Comestible     |   |   |   |   |   |   |   |   | X | X  |    | X  |
| Tricholoma focale           | Tricholome à foulard           | Médiocre       |   |   |   |   |   |   |   |   |   |    |    | X  |
| Tricholoma fumosoluteum     | Tricholome jaune fuligineux    | Médiocre       |   |   |   |   |   |   |   | X |   | X  | X  | X  |
| Tricholoma inamoenum        | Tricholo. à odeur désagréable  | Inconnue       |   |   |   |   |   | X |   | X |   | X  |    | X  |
| Tricholoma magnivelare      | Tricholome à grand voile       | Excellent      |   |   |   |   | X | X |   | X | X |    |    |    |
| Tricholoma portentosum      | Tricholome prétentieux         | Bon comestible |   |   |   |   |   |   |   |   |   |    |    | X  |
| Tricholoma pseudoterreum    | Tricholome faux-terreux        | Inconnue       |   |   |   |   |   |   |   |   | X |    |    |    |

| Nom latin               | Nom français                | Comestibilité  | 1 | 2 | 3 | 4 | 5 | 6 | 7 | 8 | 9 | 10 | 11 | 12 |
|-------------------------|-----------------------------|----------------|---|---|---|---|---|---|---|---|---|----|----|----|
| Tricholoma roseoacereum | Tricholome acerbe rosé      | Non comestible |   |   |   |   |   |   |   |   |   | X  |    | X  |
| Tricholoma saponaceum   | Tricholome savon            | non comestible |   |   |   |   | X | X | X |   |   | X  |    |    |
| Tricholoma mutans       | Tricholome changeant        | Inconnue       |   |   |   | X | X | X | X |   | X | X  |    |    |
| Tricholoma vaccinum     | Tricholome couleur de vache | non comestible |   |   |   |   |   | X |   |   |   | X  | X  | X  |
| Tricholoma virgatum     | Tricholome vergeté          | Non comestible |   |   |   |   |   |   |   |   |   | X  | X  | X  |
| Tricholomopsis decora   | Tricholome décoré           | non comestible |   |   |   | X |   | X |   |   |   | X  | X  | X  |
| Tricholomopsis rutilans | Tricholome rutilant         | Comestible     |   |   |   |   |   | X |   |   |   |    |    |    |
| Tubaria confragosa      | Tubaire annelé              | non comestible |   |   |   |   | X | X |   |   | X | X  |    |    |
| Tubaria furfuracea      | Tubaire furfuracé           | Non comestible | X |   |   |   |   |   |   |   |   |    |    |    |
| Xeromphalina campanella | Omphale en clochette        | sans intérêt   | X | X | X | X |   | X | X | X |   | X  |    | X  |
| <b>2. Chanterelles</b>  |                             |                |   |   |   |   |   |   |   |   |   |    |    |    |
| Cantharellus cibarius   | Chanterelle commune         | Bon comestible |   | X |   |   |   | X |   | X |   |    |    |    |
| Craterellus tubaeformis | Chanterelle en tube         | Bonne          |   |   |   |   | X | X | X | X |   | X  | X  |    |
| <b>3. Bolets</b>        |                             |                |   |   |   |   |   |   |   |   |   |    |    |    |
| Bolstus Aff. Édulis     | Cep D'Amérique              | Excellent      |   | X |   |   |   | X |   |   |   |    | X  |    |
| Boletus subglabripes    | Bolet à pied glabrescent    | Bon            |   |   |   |   |   | X |   |   |   |    |    |    |
| Chalciporus piperatus   | Bolet poivré                | Douteux        |   |   |   |   | X | X | X | X |   | X  |    |    |
| Chalciporus rubinellus  | Bolet Rubigineux            | Comestible     |   |   | X |   |   |   |   |   |   |    |    |    |
| Gyroporus cyanescens    | Bolet bleuissant            | Bon comestible |   |   |   |   | X |   |   |   |   |    |    |    |
| Leccinum atrospitatum   | Bolet à pied noir           | Bon            |   |   | X |   |   | X |   | X | X |    |    |    |
| Leccinum aurantiacum    | Bolet orangé                | Bon            |   |   |   | X |   | X |   |   |   |    |    |    |
| Leccinum holopus        | Bolet blanc de neige        | Comestible     |   | X |   | X | X | X | X | X | X | X  | X  | X  |
| Leccinum piceinum       | Bolet des épinettes         | Comestible     |   |   |   |   |   | X |   | X | X |    |    |    |
| Leccinum scabrum        | Bolet rugueux               | Comestible     |   |   | X | X | X | X | X |   | X | X  | X  |    |
| Suillus brevipes        | Bolet à pied court          | Très bon       |   |   |   | X |   | X |   | X | X | X  |    |    |
| Suillus cavipes         | Bolet à pied creux          | Comestible     |   |   |   |   |   |   |   |   |   | X  |    | X  |
| Suillus glandulosus     | Bolet glanduleux            | Médiocre       |   |   |   | X | X | X | X |   | X | X  |    | X  |
| Suillus grevillei       | Bolet élégant               | Comestible     |   |   |   |   |   |   |   |   |   |    |    | X  |
| Suillus neoalbidipes    | Bolet à pied blanc          | Comestible     |   |   | X |   |   |   |   | X | X | X  |    |    |
| Suillus paluster        | Bolet des marais            | Médiocre       |   |   |   |   |   |   |   |   |   |    |    | X  |
| Suillus salmonicolor    | Bolet saumon                | Comestible     |   |   |   |   |   | X |   |   | X |    |    |    |
| Suillus serotinus       | Bolet tardif                | Comestible     |   |   |   |   |   |   |   |   | X |    |    |    |
| Suillus tomentosus      | Bolet tomenteux             | Comestible     |   |   |   |   |   | X |   | X | X |    |    |    |
| Tylopilus felleus       | Bolet amer                  | Non comestible |   |   |   | X | X | X | X |   | X |    | X  |    |
| Xerocomus badius        | Bolet baie                  | Comestible     |   | X | X |   |   |   |   |   |   |    |    |    |
| Xerocomus subtomentosus | Bolet subtamenteux          | Comestible     |   |   | X |   | X | X | X | X |   | X  |    | X  |
| <b>4a. Polypores</b>    |                             |                |   |   |   |   |   |   |   |   |   |    |    |    |
| Albatrellus ovinus      | Polypore des brsbis         | Bon comestible |   |   |   |   |   | X |   |   |   |    |    | X  |
| Antrodia variformis     | Polypore variable           | non comestible |   |   |   |   |   | X |   |   |   |    |    |    |
| Bjerkandera adusta      | Polypore brûlé              | Non comestible |   |   |   | X |   | X |   |   |   | X  |    | X  |
| Boletopsis grisea       | Polypore gris               | Comestible     |   |   |   |   |   |   |   | X | X |    |    | X  |
| Cerena unicolor         | Tramète unicolor            | Non comestible |   |   |   |   |   | X |   |   |   |    |    | X  |

| Nom latin                  | Nom français           | Comestibilité  | 1 | 2 | 3 | 4 | 5 | 6 | 7 | 8 | 9 | 10 | 11 | 12 |
|----------------------------|------------------------|----------------|---|---|---|---|---|---|---|---|---|----|----|----|
| Ceriporia tarda            | Polypore tardif        | Non comestible |   |   |   |   |   | X |   |   |   |    |    |    |
| Coltricia perennis         | Polypore persistant    | non comestible |   | X |   | X | X | X | X |   | X |    |    |    |
| Fomes fomentarius          | Amadouvier             | non comestible | X | X |   | X | X | X |   |   |   | X  | X  | X  |
| Fomitopsis pinicola        | Polypore pinicole      | non comestible | X |   | X | X | X | X | X | X |   | X  | X  |    |
| Ganoderma applanatum       | Polypore des artistes  | non comestible |   |   |   |   |   | X |   |   |   |    |    |    |
| Ganoderma stugae           | Polypore des pruches   | Non comestible |   |   |   |   |   | X |   |   |   |    |    |    |
| Gloeophyllum sepiarium     | Polypore des clôtures  | non comestible | X |   |   | X |   | X |   | X | X |    |    | X  |
| Inonotus obliquus          | Polypore oblique       | Non comestible |   |   |   |   |   | X |   |   |   |    |    |    |
| Ischnoderma benzoinum      | Polypore benjoin       | Non comestible |   |   |   |   |   |   |   | X |   |    |    |    |
| Jahnoporus hirtus          | Polypore hérissé       | non comestible |   |   |   |   | X | X | X | X |   |    |    |    |
| Onnia leporina             | Polypore circiné       | Non comestible |   |   |   |   |   | X | X |   |   |    |    |    |
| Onnia tomentosa            | Polypore tomenteux     | non comestible |   |   |   |   | X | X | X |   |   | X  |    | X  |
| Phaeolus schweinitzii      | Polypore de Schweinitz | Non comestible |   |   | X |   |   |   |   |   |   |    |    |    |
| Phellinus cinereus         | Polypore cendré        | Non comestible |   |   |   |   |   | X |   |   |   |    |    |    |
| Phellinus nigricans        | Polypore noircissant   | non comestible | X | X |   |   | X | X |   |   | X |    |    |    |
| Phellinus prunicola        | Polypore du cerisier   | non comestible | X |   |   |   |   | X |   |   |   |    |    |    |
| Phellinus tremulae         | Polypore du peuplier   | Non comestible |   |   |   | X |   |   |   |   |   |    |    |    |
| Piptoporus betulinus       | Polypore du bouleau    | non comestible |   | X |   |   |   | X |   |   |   | X  |    | X  |
| Polyporus badius           | Polypore bai           | non comestible |   | X | X |   | X | X |   |   |   | X  |    |    |
| Polyporus brumalis         | Polypore d'hiver       | non comestible |   |   |   |   |   | X |   |   |   |    |    | X  |
| Polyporus tubaeformis      | Polypore en tube       | Non comestible | X |   |   |   |   | X |   |   |   |    |    |    |
| Porodaedalea piceina       | Polypore de l'épinette | non comestible | X |   | X |   | X | X |   |   |   |    |    |    |
| Postia caesius             | Polypore bleuté        | Non comestible |   |   |   |   |   |   |   | X |   | X  |    | X  |
| Postia stiptica            | Polypore styptique     | non comestible |   |   |   |   | X | X | X |   |   |    |    |    |
| Pycnoporus cinabarinus     | Polypore cinabre       | Non comestible |   |   |   | X | X |   |   | X |   |    |    |    |
| Spongipellis delectans     | Polypore attrayant     | Non comestible |   |   | X |   |   |   |   |   |   |    |    |    |
| Trametes hirsuta           | Tramète hirsute        | Non comestible |   |   |   |   |   | X |   |   |   |    |    |    |
| Trametes ochracea          | Tramète ochracée       | Non comestible |   |   |   |   |   |   |   |   |   |    |    | X  |
| Trametes pubescens         | Polypore pubescent     | Non comestible |   |   |   |   |   | X |   |   |   | X  |    |    |
| Trametes versicolor        | Tramète versicolore    | Non comestible |   | X |   |   |   | X |   |   |   |    |    | X  |
| Trichaptum abietinum       | Polypore du sapin      | non comestible |   |   | X |   |   | X |   |   |   | X  |    |    |
| Trichaptum fusco-violaceum | Polypore violet        | non comestible |   | X | X |   | X | X | X |   |   |    |    |    |
| Trichaptum laricinum       | Polypore des mélèzes   | Non comestible |   |   | X |   |   |   |   |   |   |    |    |    |
| Tyromyces chioneus         | Polypore blanc         | inconnue       |   |   |   |   |   | X |   | X |   | X  | X  | X  |
| <b>4b. Croûtes</b>         |                        |                |   |   |   |   |   |   |   |   |   |    |    |    |
| Aleurodiscus amorphus      | Corticie amorphe       | Non comestible |   |   |   |   |   | X |   |   |   |    |    |    |
| Chondrostereum purpureum   | Stérée pourpre         | Non comestible |   |   |   |   |   |   |   |   |   |    |    | X  |
| Corticium roseum           | Corticie rose          | Non comestible |   |   |   |   |   | X |   |   |   |    | X  |    |
| Plicatura nivea            | Plicature blanche      | non comestible |   |   |   |   |   |   |   |   |   | X  | X  | X  |
| Pseudochaete tabacina      | Stérée tabac           | non comestible |   |   |   |   | X | X |   |   |   |    |    |    |
| Sarcoscypha occidentalis   | Pézize occidentale     | Comestible     |   |   |   |   |   | X |   |   |   |    |    |    |
| Stereum hirsutum           | Stérée hirsute         | Non comestible | X |   |   |   |   |   |   |   |   |    |    |    |



| Nom latin                             | Nom français               | Comestibilité  | 1 | 2 | 3 | 4 | 5  | 6 | 7 | 8 | 9 | 10 | 11 | 12 |
|---------------------------------------|----------------------------|----------------|---|---|---|---|----|---|---|---|---|----|----|----|
| <i>Stereum ostrea</i>                 | Stérée tomenteuse          | Non comestible | X |   |   |   | X  |   |   |   |   |    |    |    |
| <i>Stereum sanguinolentum</i>         | Stérée sanguinolente       | Non comestible |   |   |   |   |    |   |   |   |   |    |    | X  |
| <b>5. Hydnes</b>                      |                            |                |   |   |   |   |    |   |   |   |   |    |    |    |
| <i>Bankera violascens</i>             | Hydne violacé              | Non comestible |   |   |   |   |    |   |   | X |   |    |    |    |
| <i>Hydnellum aurantiacum</i>          | Hydne orangé               | non comestible |   |   |   |   |    | X |   | X | X |    |    |    |
| <i>Hydnellum caeruleum</i>            | Hydne bleu                 | non comestible |   |   |   |   | X  | X |   | X | X |    |    | X  |
| <i>Hydnellum concrescens</i>          | Hydne concrescens          | Non comestible |   |   |   |   | X  | X |   | X | X |    |    | X  |
| <i>Hydnellum ferrugineum</i>          | Hydne ferrugineux          | Non comestible |   |   |   |   | XX | X |   | X | X |    |    |    |
| <i>Hydnellum peckii</i>               | Hydne de Peck              | non comestible |   |   |   |   |    | X |   |   | X |    |    |    |
| <i>Hydnum repandum</i>                | Hydne sinué                | Bon            |   |   |   |   | X  | X | X |   | X | X  |    |    |
| <i>Hydnum umbilicatum</i>             | Hydne ombiliqué            | Bon            |   |   |   |   | X  | X |   | X |   | X  | X  | X  |
| <i>Phellodon tomentosus</i>           | Hydne tomenteux            | Non comestible |   |   |   |   |    | X |   |   |   |    |    | X  |
| <i>Sarcodon imbricatus</i>            | Hydne imbriqué             | Comestible     |   |   |   |   |    |   |   |   | X | X  |    |    |
| <i>Sarcodon scabrosus</i>             | Hydne rugueux              | non comestible |   |   |   |   |    | X |   | X | X | X  |    | X  |
| <b>6. Clavares et analogues</b>       |                            |                |   |   |   |   |    |   |   |   |   |    |    |    |
| <i>Clavaria purpurea</i>              | Clavaire pourpre           | Non comestible |   |   |   |   |    |   |   |   |   | X  | X  | X  |
| <i>Clavulina cinerea</i>              | Clavaire cendrée           | Inconnue       |   |   |   |   |    | X | X |   |   | X  | X  | X  |
| <i>Clavulina cristata</i>             | Clavaire crêtée            | Comestible     |   |   |   | X | X  |   | X |   |   | X  | X  | X  |
| <i>Clavulina rugosa</i>               | Clavaire rugueuse          | Comestible     |   |   |   |   |    | X |   |   |   | X  | X  |    |
| <i>Clavulinopsis fusiformis</i>       | Clavaire fusiforme         | Comestible     |   |   |   |   |    | X |   |   |   |    |    |    |
| <i>Ramaria flacida</i>                | Clavaire molle             | Comestible     |   |   |   |   |    | X |   |   |   | X  | X  |    |
| <i>Ramaria rubripermanens</i>         | Ramaria à pointe vineuse   | Inconnue       |   |   |   |   |    | X |   |   |   |    |    | X  |
| <i>Thelephora caryophyllea</i>        | Téléphore en entonnoir     | Non comestible |   |   |   |   |    | X |   |   |   |    |    |    |
| <i>Thelephora terrestris</i>          | Théléphore terrestre       | non comestible |   |   |   |   |    |   |   |   |   | X  |    |    |
| <b>7. Trémelles et analogues</b>      |                            |                |   |   |   |   |    |   |   |   |   |    |    |    |
| <i>Auricularia auricula-judae</i>     | Oreille de Judas           | Comestible     |   |   |   |   |    | X |   |   |   |    |    |    |
| <i>Calocera cornea</i>                | Calocère corné             | Non comestible |   |   |   |   |    |   |   |   |   |    | X  |    |
| <i>Dacrymyces chrysospermus</i>       | Trémelle palmée            | Acceptable     |   |   |   |   | X  | X |   | X |   | X  | X  | X  |
| <i>Pseudohydnum gelatinosum</i>       | Trémelle faux-hydne        | Comestible     |   |   |   |   |    |   |   | X |   |    |    |    |
| <i>Syzygospora mycetophila</i>        | Galle des collybies        | Sans intérêt   |   |   |   | X |    |   |   |   |   |    |    |    |
| <i>Tremella lutescens</i>             | Trémelle mésentérique      | Non comestible | X |   |   |   |    |   |   | X |   |    |    |    |
| <b>8. Gastéromycètes et analogues</b> |                            |                |   |   |   |   |    |   |   |   |   |    |    |    |
| <i>Bovista plumbea</i>                | Boviste plombée            | Comestible     |   | X | X |   |    | X |   | X |   | X  |    |    |
| <i>Calvatia gigantia</i>              | Vesse-de-lopu géante       | Comestible     |   |   |   |   |    |   |   |   | X |    |    |    |
| <i>Crucibulum laeve</i>               | Crucibule lisse            | Non comestible |   |   |   |   |    |   |   |   |   | X  | X  |    |
| <i>Lycoperdon molle</i>               | Vesse-de-loup molle        | Comestible     |   |   |   |   |    | X |   |   |   |    |    | X  |
| <i>Lycoperdon nigrescens</i>          | Vesse-de-loup noircissante | Comestible     |   |   |   |   |    |   |   | X |   |    |    |    |
| <i>Lycoperdon perlatum</i>            | Vesse-de-loup perlée       | Comestible     |   |   |   |   |    | X | X | X | X | X  | X  | X  |
| <i>Lycoperdon pyriforme</i>           | Vesse-de-loup piriforme    | Comestible     |   |   |   |   |    | X |   | X | X | X  | X  |    |
| <i>Mutinus ravenelii</i>              | Mutin de Ravenel           | Non comestible |   |   |   |   |    | X |   | X |   |    |    |    |
| <i>Rhizopogon rubescens</i>           | Rhizopogon rougissant      | non comestible |   |   | X |   |    | X |   | X | X |    |    |    |

| Nom latin                   | Nom français                | Comestibilité  | 1                                                    | 2  | 3  | 4  | 5  | 6  | 7   | 8  | 9   | 10 | 11  | 12  |
|-----------------------------|-----------------------------|----------------|------------------------------------------------------|----|----|----|----|----|-----|----|-----|----|-----|-----|
| Scleroderma bovista         | Scléroderme boviste         | Vénéneux       |                                                      |    |    |    | X  | X  |     |    |     |    |     |     |
| <b>9. Ascomycètes</b>       |                             |                |                                                      |    |    |    |    |    |     |    |     |    |     |     |
| Arceuthobium pusillum       | Balais de sorcière          | Non comestible | X                                                    |    |    |    |    |    |     |    |     |    |     |     |
| Asterophora parasitica      | Astérophore parasite        | Non comestible |                                                      |    |    |    |    | X  |     |    |     |    |     |     |
| Bisporella citrina          | Calycelle citrine           | Non comestible |                                                      |    |    |    | X  | X  |     |    |     | X  | X   | X   |
| Chlorociboria aeruginascens | Chlorosplénie verdissante   | non comestible |                                                      |    |    |    |    |    |     |    |     | X  | X   |     |
| Cordyceps ophioglossoides   | Cordycep langue de serpent  | Non comestible |                                                      |    |    |    |    | X  |     |    | X   |    |     |     |
| Cudonia circinans           | Cudonie circulaire          | non comestible |                                                      |    |    |    |    | X  |     |    |     |    |     |     |
| Cudonia clavus              | Cudonie clavée              | Non comestible | X                                                    |    |    |    |    | X  |     |    |     |    |     |     |
| Dibotryon morbosum          | Nodule noir du cerisier     | non comestible |                                                      |    | X  |    | X  |    |     |    |     |    |     |     |
| Elaphomyces muricatus       | Truffe du cerf muriquée     | Non comestible |                                                      |    |    |    |    | X  |     |    | X   |    |     |     |
| Geopixis carbonaria         | Géopyxide du feu            | Non comestible | X                                                    |    |    |    |    |    |     |    |     |    |     |     |
| Gyromitra ambigua           | Gyromitre ambigu            | Toxique        |                                                      |    |    |    |    | X  |     |    |     |    |     | X   |
| Gyromitra esculenta         | Gyromitre commun            | Toxique        | X                                                    |    |    |    |    |    |     |    |     |    |     |     |
| Gyromitra infula            | Gyromitre mitré             | Vénéneux       |                                                      |    |    |    |    | X  |     |    |     |    |     |     |
| Helvella elastica           | Helvelle élastique          | Toxique        |                                                      |    |    |    |    |    |     |    |     |    | X   |     |
| Hypocreopsis lichenoides    | Hypocrée lichenoïde         | Non comestible |                                                      |    |    |    | X  | X  |     |    |     | X  |     |     |
| Hypomyces chrysospermus     | Dermatose des bolets        | non comestible |                                                      |    |    |    | X  | X  | X   |    |     |    |     |     |
| Hypomyces lactifluorum      | Dermatose des russules      | Comestible     |                                                      |    |    |    |    | X  |     | X  | X   |    |     |     |
| Hypomyces luteovirens       | Dermatose olivâtre          | Non comestible |                                                      |    |    |    |    | X  | X   |    |     |    |     |     |
| Hypomyces ochracea          | Dermatose ochracée          | non comestible |                                                      |    | X  | X  | X  | X  | X   | X  |     |    |     |     |
| Hypoxylon multifforme       | Hypoxylon multifforme       | Non comestible | X                                                    |    |    |    |    | X  |     |    |     |    |     |     |
| Lachnellula agassizii       | Pézize d'Agassiz            | sans intérêt   | X                                                    | X  |    |    | X  |    |     |    |     | X  | X   | X   |
| Leotia lubrica              | Léotie lubrique             | Comestible     |                                                      |    |    |    |    | X  |     | X  |     | X  | X   | X   |
| Melampsorella Carryophylla  | Balais de sorcière ( sapin) | Non comestible | X                                                    |    |    |    |    |    |     |    |     |    |     |     |
| Mitrlula elegans            | Mitrule élégante            | Non comestible | X                                                    |    |    |    |    |    |     |    |     |    |     |     |
| Neolecta irregularis        | Mitrule irrégulière         | Comestible     |                                                      |    |    |    |    |    | X   | X  |     | X  | X   | X   |
| Neolecta vitellina          | Mitrule jaune d'oeuf        | Comestible     |                                                      |    |    |    |    | X  | X   |    |     |    |     |     |
| Peziza repanda              | Pézize recourbée            | Comestible     |                                                      | X  |    |    | X  | X  |     | X  |     | X  |     |     |
| Pseudoplectania nigrella    | Plectanie noire             | Non comestible |                                                      |    |    | X  |    |    |     |    |     |    |     |     |
| Rhizina undulata            | Rhizine ondulée             | Non comestible |                                                      | X  |    |    | X  | X  |     |    |     |    |     |     |
| Scutellinia scutellata      | Pézize en bouclier          | sans intérêt   |                                                      |    |    |    |    |    |     |    |     |    |     | X   |
| Spatularia velutipes        | Spatulaire à pied velouté   | Non comestible |                                                      |    |    |    | X  | X  |     |    |     |    |     |     |
| Taphrinaalni                | Galle du chaton de l'aulne  | non comestible |                                                      | X  |    |    |    | X  |     |    |     |    |     |     |
| <b>12. Myxomycètes</b>      |                             |                |                                                      |    |    |    |    |    |     |    |     |    |     |     |
| Fuligo septica              | Fleur de tan                | sans intérêt   |                                                      |    | X  | X  | X  | X  | X   |    |     | X  | X   |     |
| Lycogala epidendrum         | Lycogale du bois            | Non comestible |                                                      | X  |    |    |    | X  |     | X  |     |    |     |     |
| Mucilago crustacea          | Mucus crouté                | Non comestible |                                                      | X  |    |    |    |    |     |    |     |    |     |     |
| Stemonitis fusca            | Stémonite brun foncé        | Non comestible |                                                      |    |    | X  |    |    |     |    |     |    |     |     |
| <b>Total saison : 347</b>   |                             |                | <b>Nombre d'espèces récoltées lors de la sortie:</b> | 26 | 37 | 46 | 62 | 97 | 227 | 81 | 110 | 91 | 129 | 103 |
