# Supplementary material
Source: MDPI journal article supplement (https://www.mdpi.com/1999-4907/12/9/1247)
Supplement: s1 [file s1]

**Supplementary Materials:** The following are available online at <https://www.mdpi.com/article/10.3390/f12091247/s1>, Table S1: Macroscopic mushroom species consumed by white-tailed deer harvested in 2014 on Anticosti Island (Québec, Canada). Included are the number of times their DNA sequences were obtained during sequencing of all samples from that year (Number of reads) and the number of samples in which they were found (Occurrence), Table S2: Macroscopic mushroom species consumed by white-tailed deer harvested in 2015 on Anticosti Island (Québec, Canada). Included are the number of times their DNA sequences were obtained during sequencing of all samples from that year (Number of reads) and the number of samples in which they were found (Occurrence), Table S3: Bulletin du Cercle des mycologues de Sept-îles, Volume 15, Numéro 2, Octobre 2014, Table S4: Bulletin du Cercle des mycologues de Sept-îles, Volume 16, Numéro 2, Octobre 2015.
